# Supplementary material for: EPB41L5 as a Prognostic Biomarker in Clear Cell Renal Cell Carcinoma Identified Through Disulfidptosis Related Genes
Source: Research Square preprint supplement (doi:10.21203/rs.3.rs-8319751/v1), 2026-02-03
Supplement: Supplementary file 1 [file b943451cc63cc86c92880797.docx]

Genetic Correlation Analysis

|  |  |  |  |  |  |  |  |  |
| --- | --- | --- | --- | --- | --- | --- | --- | --- |
| gene1 | gene2 | correlation | pvalue |  | gene1 | gene2 | correlation | pvalue |
| TSPAN6 | DSTN | 0.625717 | 4.90E-68 |  | ENTPD1 | FLNA | 0.636294 | 5.43E-71 |
| SEMA3F | INF2 | 0.616133 | 1.87E-65 |  | ENTPD1 | TLN1 | 0.613039 | 1.22E-64 |
| CD99 | INF2 | 0.617974 | 6.05E-66 |  | HECW2 | TLN1 | 0.6309 | 1.80E-69 |
| CD99 | PDLIM1 | 0.763858 | 1.71E-118 |  | ARHGAP24 | CD2AP | 0.694731 | 1.21E-89 |
| CD99 | FLNA | 0.66686 | 3.22E-80 |  | ARHGAP24 | MYH10 | 0.613744 | 7.95E-65 |
| CD99 | CAPZB | 0.679272 | 2.76E-84 |  | BMPR1B | PDLIM1 | -0.63522 | 1.10E-70 |
| TMEM176A | PDLIM1 | 0.663354 | 4.19E-79 |  | CDKL2 | CD2AP | 0.611819 | 2.53E-64 |
| KLHL13 | CD2AP | 0.612068 | 2.18E-64 |  | EGF | PDLIM1 | -0.67283 | 3.78E-82 |
| PLXND1 | INF2 | 0.71552 | 2.08E-97 |  | PIK3C2G | PDLIM1 | -0.67805 | 7.09E-84 |
| PLXND1 | PDLIM1 | 0.685284 | 2.49E-86 |  | SLC15A4 | PDLIM1 | 0.727338 | 3.84E-102 |
| PLXND1 | MYH9 | 0.705802 | 1.08E-93 |  | GIT2 | IQGAP1 | 0.630135 | 2.95E-69 |
| PLXND1 | FLNA | 0.76737 | 3.20E-120 |  | GIT2 | TLN1 | 0.610428 | 5.83E-64 |
| PLXND1 | TLN1 | 0.711663 | 6.47E-96 |  | LMBR1L | INF2 | 0.608174 | 2.23E-63 |
| PLXND1 | CAPZB | 0.621289 | 7.82E-67 |  | CDH24 | INF2 | 0.663789 | 3.05E-79 |
| CAMKK1 | INF2 | 0.640063 | 4.51E-72 |  | CDH24 | FLNA | 0.603011 | 4.61E-62 |
| SLC4A1 | PDLIM1 | -0.67232 | 5.53E-82 |  | PELI2 | CD2AP | 0.617975 | 6.05E-66 |
| PRKAR2B | MYH10 | 0.607974 | 2.51E-63 |  | PELI2 | MYH10 | 0.723434 | 1.50E-100 |
| WDR54 | INF2 | 0.717494 | 3.50E-98 |  | ARMH4 | MYH10 | 0.677929 | 7.77E-84 |
| WDR54 | PDLIM1 | 0.707791 | 1.93E-94 |  | AK7 | CD2AP | 0.607879 | 2.65E-63 |
| CROT | CD2AP | 0.667577 | 1.90E-80 |  | FBLN5 | MYH10 | 0.670984 | 1.51E-81 |
| CROT | DSTN | 0.625117 | 7.15E-68 |  | PML | INF2 | 0.708091 | 1.49E-94 |
| MAP3K14 | INF2 | 0.658921 | 1.02E-77 |  | PML | PDLIM1 | 0.768837 | 5.94E-121 |
| MAP3K14 | PDLIM1 | 0.608782 | 1.55E-63 |  | PML | FLNA | 0.716335 | 9.99E-98 |
| CX3CL1 | INF2 | 0.658909 | 1.03E-77 |  | PML | TLN1 | 0.631482 | 1.24E-69 |
| SCN4A | INF2 | 0.600953 | 1.52E-61 |  | PML | ACTB | 0.635283 | 1.05E-70 |
| DNAJC11 | CD2AP | 0.623194 | 2.39E-67 |  | PML | CAPZB | 0.74719 | 1.11E-110 |
| DNAJC11 | ACTN4 | 0.610654 | 5.09E-64 |  | HAPLN3 | CAPZB | 0.611264 | 3.54E-64 |
| DNAJC11 | MYH10 | 0.64245 | 9.15E-73 |  | RHCG | INF2 | -0.60557 | 1.03E-62 |
| DNAJC11 | IQGAP1 | 0.607324 | 3.68E-63 |  | RHCG | PDLIM1 | -0.74511 | 9.49E-110 |
| IL32 | PDLIM1 | 0.701315 | 4.98E-92 |  | NKD1 | MYH10 | 0.665333 | 9.89E-80 |
| IFFO1 | INF2 | 0.606781 | 5.07E-63 |  | CMTM3 | PDLIM1 | 0.676373 | 2.56E-83 |
| STAB1 | FLNA | 0.689682 | 7.41E-88 |  | CMTM3 | FLNA | 0.620146 | 1.59E-66 |
| CD4 | PDLIM1 | 0.62061 | 1.19E-66 |  | CMTM3 | ACTB | 0.623628 | 1.82E-67 |
| CD4 | CAPZB | 0.626781 | 2.50E-68 |  | CMTM3 | CAPZB | 0.664381 | 1.98E-79 |
| LARS2 | MYH10 | 0.665518 | 8.64E-80 |  | NOL3 | INF2 | 0.689631 | 7.73E-88 |
| PLAUR | ACTB | 0.606799 | 5.02E-63 |  | NOL3 | PDLIM1 | 0.75003 | 5.73E-112 |
| DCN | MYH10 | 0.623083 | 2.56E-67 |  | CDH13 | MYH9 | 0.698214 | 6.75E-91 |
| TYROBP | PDLIM1 | 0.662134 | 1.01E-78 |  | CDH13 | IQGAP1 | 0.697782 | 9.68E-91 |
| ALOX5 | PDLIM1 | 0.620053 | 1.68E-66 |  | CDH13 | FLNA | 0.626081 | 3.89E-68 |
| EHD3 | ACTN4 | 0.613901 | 7.23E-65 |  | CDH13 | TLN1 | 0.722367 | 4.03E-100 |
| EHD3 | MYH10 | 0.601824 | 9.18E-62 |  | RPS2 | PDLIM1 | 0.634081 | 2.31E-70 |
| EHD3 | TLN1 | 0.608128 | 2.29E-63 |  | KSR1 | INF2 | 0.679567 | 2.20E-84 |
| POLR3B | CD2AP | 0.671213 | 1.27E-81 |  | KSR1 | TLN1 | 0.614511 | 5.00E-65 |
| POLR3B | MYH10 | 0.702371 | 2.03E-92 |  | SLC16A3 | INF2 | 0.681257 | 5.90E-85 |
| POLR3B | IQGAP1 | 0.618789 | 3.67E-66 |  | SLC16A3 | PDLIM1 | 0.783028 | 2.56E-128 |
| TACC3 | ACTB | 0.607983 | 2.49E-63 |  | TTYH2 | MYH9 | 0.694443 | 1.54E-89 |
| TACC3 | CAPZB | 0.60894 | 1.41E-63 |  | TTYH2 | IQGAP1 | 0.603334 | 3.82E-62 |
| MTMR11 | INF2 | 0.718466 | 1.45E-98 |  | TTYH2 | FLNA | 0.681027 | 7.06E-85 |
| MTMR11 | PDLIM1 | 0.614817 | 4.15E-65 |  | TTYH2 | TLN1 | 0.696806 | 2.18E-90 |
| WAS | PDLIM1 | 0.64172 | 1.49E-72 |  | FKBP10 | PDLIM1 | 0.647054 | 4.05E-74 |
| BID | PDLIM1 | 0.676134 | 3.08E-83 |  | SH3GL1 | INF2 | 0.739061 | 4.33E-107 |
| RALBP1 | CD2AP | 0.781016 | 3.06E-127 |  | SH3GL1 | PDLIM1 | 0.780415 | 6.39E-127 |
| RALBP1 | ACTN4 | 0.608439 | 1.90E-63 |  | SH3GL1 | FLNA | 0.631493 | 1.23E-69 |
| RALBP1 | MYH10 | 0.725981 | 1.38E-101 |  | SH3GL1 | CAPZB | 0.66529 | 1.02E-79 |
| RALBP1 | IQGAP1 | 0.741876 | 2.56E-108 |  | DPP9 | PDLIM1 | 0.607465 | 3.39E-63 |
| RALBP1 | FLNB | 0.613903 | 7.22E-65 |  | TMEM91 | PDLIM1 | 0.646229 | 7.11E-74 |
| RALBP1 | DSTN | 0.676431 | 2.45E-83 |  | HUNK | CD2AP | 0.606531 | 5.88E-63 |
| CNTN1 | MYH10 | 0.684409 | 4.98E-86 |  | COL6A1 | FLNA | 0.627815 | 1.30E-68 |
| ADGRA2 | INF2 | 0.605843 | 8.81E-63 |  | COL6A2 | PDLIM1 | 0.648625 | 1.38E-74 |
| ADGRA2 | MYH9 | 0.757017 | 3.28E-115 |  | COL6A2 | FLNA | 0.722098 | 5.17E-100 |
| ADGRA2 | FLNA | 0.742429 | 1.46E-108 |  | COL6A2 | ACTB | 0.604018 | 2.56E-62 |
| ADGRA2 | TLN1 | 0.724989 | 3.51E-101 |  | COL6A2 | CAPZB | 0.625379 | 6.06E-68 |
| RUNX3 | PDLIM1 | 0.622024 | 4.96E-67 |  | EMP3 | PDLIM1 | 0.705322 | 1.63E-93 |
| FHL1 | PDLIM1 | 0.600137 | 2.43E-61 |  | SLC6A3 | INF2 | 0.664651 | 1.63E-79 |
| NDUFS1 | CD2AP | 0.730398 | 2.08E-103 |  | PRDM16 | MYH10 | 0.615403 | 2.91E-65 |
| PLEKHO1 | PDLIM1 | 0.643918 | 3.41E-73 |  | EFHD2 | PDLIM1 | 0.664586 | 1.71E-79 |
| PLEKHO1 | CAPZB | 0.62719 | 1.93E-68 |  | EFHD2 | ACTB | 0.603594 | 3.28E-62 |
| EHD2 | INF2 | 0.756984 | 3.40E-115 |  | EFHD2 | CAPZB | 0.659337 | 7.58E-78 |
| EHD2 | PDLIM1 | 0.83328 | 1.16E-159 |  | SH3BGRL3 | PDLIM1 | 0.615636 | 2.53E-65 |
| EHD2 | FLNA | 0.685694 | 1.80E-86 |  | SH3BGRL3 | ACTB | 0.674703 | 9.14E-83 |
| TYMP | PDLIM1 | 0.696826 | 2.14E-90 |  | SH3BGRL3 | CAPZB | 0.665031 | 1.23E-79 |
| VIM | INF2 | 0.628197 | 1.02E-68 |  | RPS8 | PDLIM1 | 0.656522 | 5.62E-77 |
| VIM | PDLIM1 | 0.855442 | 4.94E-177 |  | TMEM61 | PDLIM1 | -0.64737 | 3.27E-74 |
| FAS | PDLIM1 | 0.60723 | 3.89E-63 |  | IGSF3 | CD2AP | 0.606293 | 6.76E-63 |
| TNFRSF1B | PDLIM1 | 0.676648 | 2.08E-83 |  | C1orf162 | PDLIM1 | 0.696614 | 2.56E-90 |
| TNFRSF1B | FLNA | 0.659807 | 5.41E-78 |  | HMCN1 | MYH9 | 0.650595 | 3.56E-75 |
| TNFRSF1B | ACTB | 0.606422 | 6.26E-63 |  | HMCN1 | IQGAP1 | 0.66458 | 1.72E-79 |
| TNFRSF1B | CAPZB | 0.71269 | 2.61E-96 |  | HMCN1 | FLNA | 0.621766 | 5.82E-67 |
| TMSB10 | PDLIM1 | 0.755677 | 1.40E-114 |  | HMCN1 | TLN1 | 0.6705 | 2.17E-81 |
| FLT4 | INF2 | 0.713894 | 8.92E-97 |  | SLC27A3 | INF2 | 0.695757 | 5.20E-90 |
| FLT4 | MYH9 | 0.637245 | 2.91E-71 |  | SLC27A3 | PDLIM1 | 0.71087 | 1.30E-95 |
| FLT4 | TLN1 | 0.652794 | 7.72E-76 |  | EFNA3 | PDLIM1 | 0.661722 | 1.37E-78 |
| BARX2 | INF2 | 0.621127 | 8.65E-67 |  | RIT1 | INF2 | 0.643359 | 4.97E-73 |
| BARX2 | PDLIM1 | 0.603562 | 3.35E-62 |  | SCCPDH | CD2AP | 0.623048 | 2.62E-67 |
| LCP2 | PDLIM1 | 0.652226 | 1.15E-75 |  | SCCPDH | DSTN | 0.628802 | 6.91E-69 |
| ADRB1 | PDLIM1 | -0.63082 | 1.90E-69 |  | DEGS1 | PDLIM1 | 0.647882 | 2.30E-74 |
| PHKA2 | INF2 | 0.687089 | 5.94E-87 |  | MBOAT2 | MYH10 | 0.633627 | 3.10E-70 |
| PHKA2 | PDLIM1 | 0.631426 | 1.29E-69 |  | GDF7 | MYH10 | 0.701879 | 3.09E-92 |
| KITLG | DSTN | 0.636571 | 4.53E-71 |  | ATP6V1C2 | PDLIM1 | -0.72932 | 5.81E-103 |
| EPN3 | PDLIM1 | -0.6893 | 1.01E-87 |  | ACKR3 | PDLIM1 | 0.669297 | 5.31E-81 |
| RFC2 | PDLIM1 | 0.683962 | 7.09E-86 |  | POMGNT2 | ACTN4 | 0.624803 | 8.71E-68 |
| COL23A1 | INF2 | 0.683817 | 7.94E-86 |  | POMGNT2 | MYH10 | 0.698151 | 7.12E-91 |
| COL23A1 | PDLIM1 | 0.742666 | 1.15E-108 |  | POMGNT2 | FLNB | 0.618547 | 4.26E-66 |
| AP5M1 | CD2AP | 0.691361 | 1.91E-88 |  | POMGNT2 | DSTN | 0.635866 | 7.19E-71 |
| AP5M1 | MYH10 | 0.615985 | 2.04E-65 |  | GASK1A | MYH10 | 0.623287 | 2.25E-67 |
| AP5M1 | DSTN | 0.606911 | 4.70E-63 |  | CTDSPL | CD2AP | 0.671075 | 1.41E-81 |
| FOXC1 | MYH10 | 0.666216 | 5.18E-80 |  | CTDSPL | MYH10 | 0.665384 | 9.53E-80 |
| FOXC1 | DSTN | 0.604568 | 1.86E-62 |  | CTDSPL | DSTN | 0.645614 | 1.08E-73 |
| SYNE2 | CD2AP | 0.705904 | 9.88E-94 |  | CAND2 | MYH10 | 0.740904 | 6.82E-108 |
| SYNE2 | MYH10 | 0.619276 | 2.72E-66 |  | COL8A1 | PDLIM1 | 0.633406 | 3.58E-70 |
| SYNE2 | IQGAP1 | 0.633548 | 3.26E-70 |  | COL8A1 | FLNA | 0.635613 | 8.49E-71 |
| CCDC85A | TLN1 | 0.641158 | 2.17E-72 |  | TMEM44 | PDLIM1 | 0.665429 | 9.22E-80 |
| TRAF3IP2 | INF2 | 0.6049 | 1.53E-62 |  | KLHL8 | CD2AP | 0.807083 | 3.63E-142 |
| TRAF3IP2 | PDLIM1 | 0.707073 | 3.60E-94 |  | KLHL8 | IQGAP1 | 0.759377 | 2.49E-116 |
| PRDM1 | PDLIM1 | 0.629821 | 3.60E-69 |  | KLHL8 | DSTN | 0.667308 | 2.32E-80 |
| SLC2A3 | PDLIM1 | 0.624543 | 1.03E-67 |  | USP53 | CD2AP | 0.730805 | 1.41E-103 |
| YBX3 | PDLIM1 | 0.731288 | 8.84E-104 |  | USP53 | MYH10 | 0.630439 | 2.43E-69 |
| WNK1 | CD2AP | 0.671872 | 7.75E-82 |  | USP53 | IQGAP1 | 0.610066 | 7.23E-64 |
| WNK1 | MYH10 | 0.635278 | 1.06E-70 |  | USP53 | DSTN | 0.611577 | 2.93E-64 |
| WNK1 | IQGAP1 | 0.690931 | 2.70E-88 |  | MYO10 | MYH10 | 0.643649 | 4.08E-73 |
| OGFR | INF2 | 0.692468 | 7.74E-89 |  | OSMR | PDLIM1 | 0.708333 | 1.20E-94 |
| OGFR | PDLIM1 | 0.610647 | 5.11E-64 |  | OSMR | FLNA | 0.654497 | 2.34E-76 |
| GNA15 | CAPZB | 0.614503 | 5.02E-65 |  | PLK2 | INF2 | 0.604631 | 1.79E-62 |
| LZTS1 | INF2 | 0.647873 | 2.32E-74 |  | PLK2 | PDLIM1 | 0.664924 | 1.33E-79 |
| LZTS1 | PDLIM1 | 0.666174 | 5.34E-80 |  | IQGAP2 | CD2AP | 0.608996 | 1.37E-63 |
| LZTS1 | FLNA | 0.643193 | 5.55E-73 |  | ARHGAP26 | TLN1 | 0.605989 | 8.08E-63 |
| SPAG4 | PDLIM1 | 0.727234 | 4.24E-102 |  | TNIP1 | INF2 | 0.659208 | 8.31E-78 |
| GUCY1B1 | PDLIM1 | 0.71039 | 1.99E-95 |  | TNIP1 | PDLIM1 | 0.680242 | 1.30E-84 |
| GUCY1B1 | FLNA | 0.622211 | 4.41E-67 |  | KCNMB1 | FLNA | 0.603006 | 4.62E-62 |
| TNK2 | INF2 | 0.695599 | 5.92E-90 |  | GFOD1 | MYH9 | 0.600042 | 2.57E-61 |
| SBNO2 | FLNA | 0.614034 | 6.67E-65 |  | GFOD1 | TLN1 | 0.625692 | 4.97E-68 |
| CALCRL | IQGAP1 | 0.652655 | 8.50E-76 |  | DCDC2 | CD2AP | 0.652694 | 8.27E-76 |
| CALCRL | TLN1 | 0.62368 | 1.76E-67 |  | SLC17A4 | INF2 | 0.605715 | 9.49E-63 |
| OAT | CD2AP | 0.602152 | 7.59E-62 |  | MMUT | CD2AP | 0.815849 | 1.04E-147 |
| OAT | MYH10 | 0.609053 | 1.32E-63 |  | MMUT | IQGAP1 | 0.625217 | 6.71E-68 |
| OAT | DSTN | 0.653204 | 5.79E-76 |  | MMUT | DSTN | 0.624339 | 1.17E-67 |
| PDIA5 | PDLIM1 | 0.706288 | 7.09E-94 |  | DOK3 | PDLIM1 | 0.62224 | 4.33E-67 |
| SPI1 | PDLIM1 | 0.633872 | 2.64E-70 |  | PPP1R18 | INF2 | 0.633878 | 2.63E-70 |
| FECH | CD2AP | 0.660928 | 2.42E-78 |  | PPP1R18 | PDLIM1 | 0.76559 | 2.43E-119 |
| FECH | MYH10 | 0.60142 | 1.16E-61 |  | PPP1R18 | FLNA | 0.706941 | 4.03E-94 |
| PFKP | INF2 | 0.703544 | 7.49E-93 |  | PPP1R18 | ACTB | 0.662366 | 8.57E-79 |
| PFKP | PDLIM1 | 0.771112 | 4.25E-122 |  | PPP1R18 | CAPZB | 0.699678 | 1.98E-91 |
| PFKP | FLNA | 0.616485 | 1.51E-65 |  | SCUBE3 | MYH10 | 0.61431 | 5.65E-65 |
| ACSL4 | CD2AP | 0.694085 | 2.06E-89 |  | NFKBIE | PDLIM1 | 0.623306 | 2.23E-67 |
| ACSL4 | IQGAP1 | 0.663518 | 3.72E-79 |  | PRSS35 | MYH10 | 0.610838 | 4.56E-64 |
| ACSL4 | DSTN | 0.638344 | 1.41E-71 |  | SLC2A12 | PDLIM1 | -0.67022 | 2.66E-81 |
| ATP11A | INF2 | 0.631927 | 9.31E-70 |  | EGFR | IQGAP1 | 0.62976 | 3.75E-69 |
| ATP11A | TLN1 | 0.666268 | 4.98E-80 |  | IGFBP3 | PDLIM1 | 0.718836 | 1.03E-98 |
| RASGRP2 | INF2 | 0.670212 | 2.69E-81 |  | ZC3HAV1L | IQGAP1 | 0.628777 | 7.03E-69 |
| TGFBR3 | CD2AP | 0.617739 | 6.99E-66 |  | TMEM140 | PDLIM1 | 0.634721 | 1.52E-70 |
| TGFBR3 | MYH10 | 0.622471 | 3.75E-67 |  | DIPK2B | INF2 | 0.667212 | 2.49E-80 |
| PTPN3 | CD2AP | 0.641628 | 1.59E-72 |  | DIPK2B | PDLIM1 | 0.634203 | 2.13E-70 |
| FSTL3 | PDLIM1 | 0.635784 | 7.58E-71 |  | DIAPH2 | IQGAP1 | 0.684323 | 5.33E-86 |
| MAP4K4 | PDLIM1 | 0.6688 | 7.68E-81 |  | DIAPH2 | FLNA | 0.615427 | 2.87E-65 |
| MAP4K4 | MYH9 | 0.689813 | 6.67E-88 |  | DIAPH2 | TLN1 | 0.622502 | 3.68E-67 |
| MAP4K4 | IQGAP1 | 0.647717 | 2.58E-74 |  | GPC3 | MYH10 | 0.627003 | 2.17E-68 |
| MAP4K4 | FLNA | 0.746175 | 3.17E-110 |  | MFHAS1 | CD2AP | 0.654746 | 1.97E-76 |
| MAP4K4 | TLN1 | 0.698917 | 3.75E-91 |  | MFHAS1 | MYH10 | 0.638756 | 1.07E-71 |
| MAP4K4 | CAPZB | 0.622527 | 3.62E-67 |  | MFHAS1 | IQGAP1 | 0.620782 | 1.07E-66 |
| VASH1 | INF2 | 0.621509 | 6.83E-67 |  | FATE1 | INF2 | 0.641381 | 1.87E-72 |
| VASH1 | MYH9 | 0.639844 | 5.21E-72 |  | FATE1 | PDLIM1 | 0.606124 | 7.47E-63 |
| VASH1 | FLNA | 0.688099 | 2.65E-87 |  | RPL10 | PDLIM1 | 0.655111 | 1.52E-76 |
| VASH1 | TLN1 | 0.673688 | 1.97E-82 |  | SLC26A7 | PDLIM1 | -0.73425 | 5.00E-105 |
| MPP5 | CD2AP | 0.783476 | 1.47E-128 |  | ATP6V0D2 | INF2 | -0.60754 | 3.25E-63 |
| MPP5 | MYH10 | 0.630574 | 2.22E-69 |  | ATP6V0D2 | PDLIM1 | -0.72518 | 2.94E-101 |
| MPP5 | IQGAP1 | 0.619945 | 1.80E-66 |  | AK3 | CD2AP | 0.675778 | 4.03E-83 |
| MPP5 | DSTN | 0.615838 | 2.23E-65 |  | AK3 | MYH10 | 0.632874 | 5.05E-70 |
| P4HA2 | PDLIM1 | 0.612205 | 2.01E-64 |  | AK3 | DSTN | 0.627985 | 1.16E-68 |
| STK10 | INF2 | 0.670611 | 2.00E-81 |  | PLIN2 | INF2 | 0.623365 | 2.15E-67 |
| STK10 | PDLIM1 | 0.664162 | 2.33E-79 |  | PLIN2 | PDLIM1 | 0.653694 | 4.11E-76 |
| STK10 | MYH9 | 0.697235 | 1.53E-90 |  | PLPPR1 | PDLIM1 | -0.61919 | 2.87E-66 |
| STK10 | IQGAP1 | 0.61746 | 8.29E-66 |  | SLC25A25 | MYH10 | 0.638302 | 1.45E-71 |
| STK10 | FLNA | 0.76168 | 1.95E-117 |  | FAM171A1 | MYH10 | 0.652183 | 1.18E-75 |
| STK10 | TLN1 | 0.76701 | 4.82E-120 |  | CNNM2 | MYH10 | 0.628491 | 8.43E-69 |
| STK10 | CAPZB | 0.702067 | 2.63E-92 |  | RGS10 | PDLIM1 | 0.606599 | 5.64E-63 |
| EVC | CD2AP | 0.670695 | 1.87E-81 |  | ADM | PDLIM1 | 0.631943 | 9.21E-70 |
| EVC | ACTN4 | 0.613879 | 7.33E-65 |  | DGKZ | INF2 | 0.707176 | 3.29E-94 |
| EVC | MYH10 | 0.611884 | 2.44E-64 |  | DGKZ | PDLIM1 | 0.652247 | 1.13E-75 |
| EVC | TLN1 | 0.616704 | 1.32E-65 |  | SERPINH1 | PDLIM1 | 0.700656 | 8.69E-92 |
| SCARB1 | INF2 | 0.64221 | 1.07E-72 |  | SERPINH1 | FLNA | 0.661928 | 1.18E-78 |
| SCARB1 | PDLIM1 | 0.703499 | 7.78E-93 |  | SERPINH1 | ACTB | 0.692774 | 6.03E-89 |
| FRY | ACTN4 | 0.601326 | 1.22E-61 |  | SERPINH1 | CAPZB | 0.662896 | 5.84E-79 |
| FRY | MYH9 | 0.62061 | 1.19E-66 |  | CAPN5 | MYH10 | 0.625924 | 4.30E-68 |
| FRY | MYH10 | 0.723195 | 1.87E-100 |  | DUSP15 | PDLIM1 | -0.63506 | 1.22E-70 |
| FRY | IQGAP1 | 0.608748 | 1.58E-63 |  | FERMT3 | PDLIM1 | 0.62369 | 1.75E-67 |
| FRY | TLN1 | 0.600374 | 2.12E-61 |  | FERMT3 | CAPZB | 0.614588 | 4.77E-65 |
| FRY | DSTN | 0.642065 | 1.18E-72 |  | CLEC1A | INF2 | 0.611163 | 3.75E-64 |
| NOTCH3 | INF2 | 0.600409 | 2.08E-61 |  | FXYD4 | PDLIM1 | -0.60424 | 2.25E-62 |
| NOTCH3 | MYH9 | 0.705641 | 1.24E-93 |  | SLC7A11 | SLC7A11 | 1 | 0 |
| NOTCH3 | FLNA | 0.721286 | 1.09E-99 |  | ANK3 | CD2AP | 0.618915 | 3.40E-66 |
| NOTCH3 | TLN1 | 0.67511 | 6.71E-83 |  | EDNRA | MYH9 | 0.612696 | 1.50E-64 |
| NTN4 | CD2AP | 0.62249 | 3.71E-67 |  | EDNRA | FLNA | 0.607621 | 3.09E-63 |
| SCARF1 | INF2 | 0.708865 | 7.56E-95 |  | NR3C2 | CD2AP | 0.611835 | 2.51E-64 |
| SCARF1 | MYH9 | 0.605213 | 1.27E-62 |  | ASAP2 | CD2AP | 0.67844 | 5.24E-84 |
| SCARF1 | TLN1 | 0.629594 | 4.17E-69 |  | ASAP2 | ACTN4 | 0.664308 | 2.09E-79 |
| HACD3 | CD2AP | 0.662951 | 5.61E-79 |  | ASAP2 | MYH9 | 0.642185 | 1.09E-72 |
| HACD3 | DSTN | 0.631147 | 1.54E-69 |  | ASAP2 | MYH10 | 0.691023 | 2.51E-88 |
| MYDGF | PDLIM1 | 0.638763 | 1.07E-71 |  | ASAP2 | IQGAP1 | 0.743629 | 4.32E-109 |
| FSCN1 | PDLIM1 | 0.642835 | 7.06E-73 |  | ASAP2 | FLNB | 0.665356 | 9.73E-80 |
| FSCN1 | MYH9 | 0.632069 | 8.49E-70 |  | ASAP2 | TLN1 | 0.678535 | 4.87E-84 |
| FSCN1 | FLNA | 0.698387 | 5.84E-91 |  | FLI1 | INF2 | 0.601871 | 8.93E-62 |
| FSCN1 | ACTB | 0.650463 | 3.89E-75 |  | FLI1 | PDLIM1 | 0.612016 | 2.25E-64 |
| FSCN1 | CAPZB | 0.678529 | 4.89E-84 |  | FLI1 | MYH9 | 0.642682 | 7.83E-73 |
| ARHGAP15 | PDLIM1 | 0.622002 | 5.02E-67 |  | FLI1 | IQGAP1 | 0.629385 | 4.77E-69 |
| PAG1 | PDLIM1 | 0.600348 | 2.15E-61 |  | FLI1 | FLNA | 0.651628 | 1.74E-75 |
| MCAM | INF2 | 0.654201 | 2.88E-76 |  | FLI1 | TLN1 | 0.687042 | 6.17E-87 |
| MCAM | PDLIM1 | 0.727806 | 2.47E-102 |  | KCNE4 | PDLIM1 | 0.613085 | 1.18E-64 |
| MCAM | MYH9 | 0.604017 | 2.56E-62 |  | HSPB8 | PDLIM1 | 0.664291 | 2.12E-79 |
| MCAM | FLNA | 0.667997 | 1.39E-80 |  | PDK1 | PDLIM1 | 0.600223 | 2.31E-61 |
| ARHGEF1 | INF2 | 0.721503 | 8.96E-100 |  | JMY | CD2AP | 0.628375 | 9.08E-69 |
| DGKD | INF2 | 0.736031 | 8.72E-106 |  | JMY | MYH10 | 0.717718 | 2.86E-98 |
| DGKD | PDLIM1 | 0.660036 | 4.60E-78 |  | GPD1L | MYH10 | 0.603685 | 3.11E-62 |
| DGKD | FLNA | 0.620149 | 1.59E-66 |  | RASGRP3 | MYH9 | 0.603578 | 3.31E-62 |
| NFKB2 | INF2 | 0.684422 | 4.93E-86 |  | RASGRP3 | IQGAP1 | 0.608151 | 2.26E-63 |
| NFKB2 | PDLIM1 | 0.672671 | 4.25E-82 |  | RASGRP3 | TLN1 | 0.658605 | 1.28E-77 |
| IL4R | INF2 | 0.723446 | 1.48E-100 |  | PANK1 | CD2AP | 0.60021 | 2.33E-61 |
| IL4R | PDLIM1 | 0.766522 | 8.42E-120 |  | GRM1 | PDLIM1 | -0.63662 | 4.39E-71 |
| IL4R | FLNA | 0.71109 | 1.07E-95 |  | LGI2 | MYH10 | 0.648082 | 2.01E-74 |
| IL4R | CAPZB | 0.621103 | 8.78E-67 |  | SCOC | CD2AP | 0.695896 | 4.63E-90 |
| EXOSC5 | PDLIM1 | 0.61264 | 1.55E-64 |  | SCOC | DSTN | 0.720116 | 3.21E-99 |
| APBB1IP | PDLIM1 | 0.684807 | 3.64E-86 |  | BMP6 | MYH10 | 0.603908 | 2.73E-62 |
| MCCC1 | CD2AP | 0.680592 | 9.91E-85 |  | ADGRF1 | PDLIM1 | -0.62665 | 2.72E-68 |
| NEBL | CD2AP | 0.614988 | 3.74E-65 |  | ASAP1 | MYH9 | 0.71156 | 7.09E-96 |
| FDFT1 | CD2AP | 0.62776 | 1.34E-68 |  | ASAP1 | IQGAP1 | 0.738896 | 5.10E-107 |
| FDFT1 | MYH10 | 0.618039 | 5.82E-66 |  | ASAP1 | FLNA | 0.705056 | 2.05E-93 |
| FDFT1 | DSTN | 0.652447 | 9.82E-76 |  | ASAP1 | TLN1 | 0.744893 | 1.19E-109 |
| OPHN1 | CD2AP | 0.722111 | 5.11E-100 |  | LPCAT1 | INF2 | 0.614343 | 5.54E-65 |
| OPHN1 | MYH10 | 0.705001 | 2.15E-93 |  | LPCAT1 | PDLIM1 | 0.737681 | 1.71E-106 |
| OPHN1 | IQGAP1 | 0.662288 | 9.07E-79 |  | C16orf89 | PDLIM1 | -0.62846 | 8.60E-69 |
| OPHN1 | FLNB | 0.604671 | 1.75E-62 |  | MSI2 | CD2AP | 0.648806 | 1.22E-74 |
| OPHN1 | DSTN | 0.610896 | 4.41E-64 |  | GRAP | MYH9 | 0.673398 | 2.46E-82 |
| SCGN | INF2 | 0.604729 | 1.69E-62 |  | GRAP | FLNA | 0.62712 | 2.02E-68 |
| CARMIL1 | CD2AP | 0.753499 | 1.45E-113 |  | GRAP | TLN1 | 0.680842 | 8.16E-85 |
| CARMIL1 | MYH10 | 0.637377 | 2.67E-71 |  | PITPNC1 | INF2 | 0.671029 | 1.46E-81 |
| CARMIL1 | IQGAP1 | 0.617635 | 7.45E-66 |  | LRRK1 | FLNA | 0.615727 | 2.39E-65 |
| COL5A3 | PDLIM1 | 0.615579 | 2.61E-65 |  | ENPP3 | PDLIM1 | 0.683586 | 9.53E-86 |
| MAGI3 | MYH10 | 0.667495 | 2.02E-80 |  | PGM5 | MYH10 | 0.648826 | 1.20E-74 |
| COL4A4 | CD2AP | 0.643192 | 5.55E-73 |  | PGM5 | DSTN | 0.620804 | 1.06E-66 |
| COL4A4 | MYH10 | 0.628886 | 6.55E-69 |  | CA10 | PDLIM1 | -0.62043 | 1.33E-66 |
| MEF2C | MYH9 | 0.613886 | 7.30E-65 |  | MARVELD1 | PDLIM1 | 0.666514 | 4.16E-80 |
| MEF2C | IQGAP1 | 0.601691 | 9.92E-62 |  | MARVELD1 | FLNA | 0.728245 | 1.63E-102 |
| MEF2C | FLNA | 0.610853 | 4.52E-64 |  | MARVELD1 | CAPZB | 0.653348 | 5.24E-76 |
| MEF2C | TLN1 | 0.637849 | 1.95E-71 |  | SLC16A1 | PDLIM1 | 0.614297 | 5.69E-65 |
| CADPS2 | CD2AP | 0.700744 | 8.07E-92 |  | ELMO1 | INF2 | 0.642124 | 1.14E-72 |
| CADPS2 | MYH10 | 0.606779 | 5.08E-63 |  | ELMO1 | PDLIM1 | 0.708125 | 1.44E-94 |
| CADPS2 | IQGAP1 | 0.608285 | 2.08E-63 |  | ELMO1 | TLN1 | 0.608058 | 2.38E-63 |
| CADPS2 | DSTN | 0.607519 | 3.28E-63 |  | ADK | CD2AP | 0.652419 | 1.00E-75 |
| ATP8B1 | MYH10 | 0.666795 | 3.38E-80 |  | ADK | DSTN | 0.6732 | 2.85E-82 |
| ATP8B1 | IQGAP1 | 0.626365 | 3.25E-68 |  | SLC28A1 | INF2 | 0.622988 | 2.72E-67 |
| ATP8B1 | FLNB | 0.620434 | 1.33E-66 |  | MAP3K7CL | PDLIM1 | 0.601932 | 8.62E-62 |
| ATP8B1 | DSTN | 0.64396 | 3.31E-73 |  | CLDN8 | PDLIM1 | -0.68914 | 1.15E-87 |
| COBLL1 | CD2AP | 0.620577 | 1.22E-66 |  | PCDH1 | MYH10 | 0.60621 | 7.10E-63 |
| COBLL1 | MYH10 | 0.629415 | 4.67E-69 |  | MMP14 | PDLIM1 | 0.65508 | 1.55E-76 |
| SEMA5B | INF2 | 0.683165 | 1.33E-85 |  | MMP14 | FLNA | 0.672158 | 6.26E-82 |
| SEMA5B | PDLIM1 | 0.770269 | 1.13E-121 |  | MMP14 | CAPZB | 0.64826 | 1.78E-74 |
| BCKDHB | CD2AP | 0.690278 | 4.58E-88 |  | FZD1 | INF2 | 0.62701 | 2.16E-68 |
| PLOD1 | PDLIM1 | 0.733368 | 1.18E-104 |  | FZD1 | PDLIM1 | 0.623545 | 1.92E-67 |
| PLOD1 | FLNA | 0.621988 | 5.07E-67 |  | AFAP1L1 | MYH9 | 0.637498 | 2.46E-71 |
| PLOD1 | CAPZB | 0.650371 | 4.15E-75 |  | AFAP1L1 | TLN1 | 0.620943 | 9.70E-67 |
| MECOM | MYH10 | 0.620908 | 9.91E-67 |  | TSPAN18 | INF2 | 0.671737 | 8.58E-82 |
| AQP6 | PDLIM1 | -0.63848 | 1.29E-71 |  | TSPAN18 | PDLIM1 | 0.634517 | 1.74E-70 |
| BAX | INF2 | 0.608775 | 1.56E-63 |  | TMEM164 | MYH10 | 0.681217 | 6.09E-85 |
| BAX | PDLIM1 | 0.721047 | 1.36E-99 |  | TMEM164 | IQGAP1 | 0.617129 | 1.02E-65 |
| CETP | INF2 | 0.637513 | 2.44E-71 |  | TNFRSF14 | INF2 | 0.667448 | 2.09E-80 |
| SH3BP2 | INF2 | 0.705438 | 1.48E-93 |  | PAFAH2 | CD2AP | 0.696878 | 2.05E-90 |
| SH3BP2 | PDLIM1 | 0.637889 | 1.90E-71 |  | GALNT14 | INF2 | 0.613225 | 1.09E-64 |
| L2HGDH | CD2AP | 0.651799 | 1.54E-75 |  | GALNT14 | PDLIM1 | 0.656489 | 5.75E-77 |
| NID2 | ACTN4 | 0.600962 | 1.51E-61 |  | CLSTN2 | MYH10 | 0.642604 | 8.25E-73 |
| NID2 | MYH9 | 0.771242 | 3.66E-122 |  | CD1D | INF2 | 0.646529 | 5.80E-74 |
| NID2 | IQGAP1 | 0.675062 | 6.96E-83 |  | CD1D | PDLIM1 | 0.697671 | 1.06E-90 |
| NID2 | FLNA | 0.68846 | 1.98E-87 |  | VWA5B1 | PDLIM1 | -0.61717 | 9.89E-66 |
| NID2 | TLN1 | 0.750742 | 2.71E-112 |  | FCER1G | PDLIM1 | 0.631142 | 1.54E-69 |
| RFX2 | INF2 | 0.750465 | 3.63E-112 |  | IFNGR2 | PDLIM1 | 0.7126 | 2.82E-96 |
| RFX2 | PDLIM1 | 0.606549 | 5.81E-63 |  | IFNGR2 | CAPZB | 0.609904 | 7.96E-64 |
| PTPN4 | CD2AP | 0.777304 | 2.78E-125 |  | C1QC | PDLIM1 | 0.618339 | 4.84E-66 |
| PTPN4 | IQGAP1 | 0.655165 | 1.46E-76 |  | HK2 | PDLIM1 | 0.740214 | 1.36E-107 |
| SMOX | INF2 | 0.624026 | 1.42E-67 |  | AMFR | MYH10 | 0.600993 | 1.48E-61 |
| SMOX | PDLIM1 | 0.623568 | 1.89E-67 |  | AMFR | DSTN | 0.605816 | 8.94E-63 |
| OAS1 | PDLIM1 | 0.605908 | 8.48E-63 |  | TPPP3 | INF2 | 0.641212 | 2.10E-72 |
| FXYD5 | PDLIM1 | 0.732143 | 3.87E-104 |  | ITGB2 | PDLIM1 | 0.651819 | 1.52E-75 |
| FXYD5 | ACTB | 0.678776 | 4.04E-84 |  | SHC1 | PDLIM1 | 0.65757 | 2.67E-77 |
| FXYD5 | CAPZB | 0.645367 | 1.28E-73 |  | SHC1 | MYH9 | 0.627425 | 1.66E-68 |
| GRAMD1A | INF2 | 0.656305 | 6.55E-77 |  | SHC1 | FLNA | 0.734741 | 3.09E-105 |
| GRAMD1A | PDLIM1 | 0.701243 | 5.29E-92 |  | SHC1 | TLN1 | 0.644151 | 2.91E-73 |
| GRAMD1A | FLNA | 0.601671 | 1.00E-61 |  | SHC1 | CAPZB | 0.655589 | 1.09E-76 |
| GRAMD1A | CAPZB | 0.617451 | 8.34E-66 |  | LY6E | PDLIM1 | 0.624099 | 1.35E-67 |
| GMIP | PDLIM1 | 0.611606 | 2.88E-64 |  | SH2B2 | INF2 | 0.609997 | 7.53E-64 |
| GMIP | CAPZB | 0.647842 | 2.36E-74 |  | SH2B2 | PDLIM1 | 0.664027 | 2.57E-79 |
| ICAM1 | PDLIM1 | 0.678549 | 4.82E-84 |  | NAPEPLD | CD2AP | 0.780567 | 5.30E-127 |
| ICAM1 | FLNA | 0.600008 | 2.62E-61 |  | NAPEPLD | IQGAP1 | 0.629942 | 3.34E-69 |
| PLEKHG2 | INF2 | 0.692916 | 5.37E-89 |  | PLXDC1 | PDLIM1 | 0.600187 | 2.36E-61 |
| PLEKHG2 | PDLIM1 | 0.673623 | 2.07E-82 |  | FDXR | PDLIM1 | 0.62871 | 7.34E-69 |
| PLEKHG2 | FLNA | 0.706484 | 5.98E-94 |  | CYGB | INF2 | 0.699621 | 2.08E-91 |
| DTX2 | PDLIM1 | 0.644905 | 1.75E-73 |  | CYGB | PDLIM1 | 0.626708 | 2.62E-68 |
| SEL1L3 | PDLIM1 | 0.662785 | 6.33E-79 |  | ITGA5 | PDLIM1 | 0.744783 | 1.33E-109 |
| NLRP1 | INF2 | 0.62865 | 7.62E-69 |  | ITGA5 | MYH9 | 0.606623 | 5.57E-63 |
| ANGPT2 | PDLIM1 | 0.634875 | 1.37E-70 |  | ITGA5 | FLNA | 0.716514 | 8.50E-98 |
| CD200 | PDLIM1 | 0.643317 | 5.11E-73 |  | ITGA5 | CAPZB | 0.619972 | 1.77E-66 |
| JPH4 | MYH10 | 0.618589 | 4.15E-66 |  | FMNL3 | MYH9 | 0.704435 | 3.49E-93 |
| SEMA6A | INF2 | 0.614955 | 3.82E-65 |  | FMNL3 | IQGAP1 | 0.617213 | 9.65E-66 |
| EPB41L4B | PDLIM1 | -0.70084 | 7.41E-92 |  | FMNL3 | FLNA | 0.712813 | 2.33E-96 |
| SH2D3C | INF2 | 0.72552 | 2.13E-101 |  | FMNL3 | TLN1 | 0.720375 | 2.53E-99 |
| SH2D3C | PDLIM1 | 0.614723 | 4.40E-65 |  | FMNL3 | CAPZB | 0.618171 | 5.37E-66 |
| SH2D3C | MYH9 | 0.622152 | 4.58E-67 |  | BCL6B | INF2 | 0.631783 | 1.02E-69 |
| SH2D3C | FLNA | 0.619349 | 2.60E-66 |  | BCL6B | MYH9 | 0.650957 | 2.77E-75 |
| SH2D3C | TLN1 | 0.638374 | 1.38E-71 |  | BCL6B | FLNA | 0.602452 | 6.38E-62 |
| ERMP1 | CD2AP | 0.687008 | 6.33E-87 |  | BCL6B | TLN1 | 0.638122 | 1.63E-71 |
| ERMP1 | MYH10 | 0.682896 | 1.64E-85 |  | WDR90 | INF2 | 0.614429 | 5.25E-65 |
| ERMP1 | DSTN | 0.607468 | 3.38E-63 |  | TAL1 | INF2 | 0.60253 | 6.09E-62 |
| NRP1 | INF2 | 0.612728 | 1.47E-64 |  | BSND | PDLIM1 | -0.74062 | 9.07E-108 |
| NRP1 | PDLIM1 | 0.68704 | 6.17E-87 |  | LAPTM5 | PDLIM1 | 0.65308 | 6.32E-76 |
| NRP1 | MYH9 | 0.648242 | 1.80E-74 |  | SDC3 | PDLIM1 | 0.651833 | 1.51E-75 |
| NRP1 | IQGAP1 | 0.650873 | 2.93E-75 |  | SDC3 | FLNA | 0.732246 | 3.51E-104 |
| NRP1 | FLNA | 0.704364 | 3.71E-93 |  | SDC3 | TLN1 | 0.62215 | 4.58E-67 |
| NRP1 | TLN1 | 0.703908 | 5.49E-93 |  | SDC3 | ACTB | 0.637325 | 2.76E-71 |
| MYO9B | INF2 | 0.600751 | 1.71E-61 |  | SDC3 | CAPZB | 0.735607 | 1.32E-105 |
| MYO9B | PDLIM1 | 0.605993 | 8.06E-63 |  | OMA1 | CD2AP | 0.671895 | 7.62E-82 |
| MYO9B | FLNA | 0.72732 | 3.91E-102 |  | GBP2 | PDLIM1 | 0.629743 | 3.79E-69 |
| MYO9B | TLN1 | 0.642786 | 7.30E-73 |  | OLFML2B | PDLIM1 | 0.688857 | 1.44E-87 |
| MYO9B | CAPZB | 0.663946 | 2.72E-79 |  | OLFML2B | FLNA | 0.645191 | 1.44E-73 |
| HSD3B7 | PDLIM1 | 0.641153 | 2.18E-72 |  | LRRC52 | PDLIM1 | -0.60551 | 1.07E-62 |
| MMP11 | PDLIM1 | 0.626434 | 3.11E-68 |  | DISC1 | IQGAP1 | 0.625587 | 5.31E-68 |
| PPM1F | INF2 | 0.72433 | 6.50E-101 |  | DISC1 | FLNA | 0.618391 | 4.69E-66 |
| PPM1F | MYH9 | 0.67081 | 1.72E-81 |  | DISC1 | TLN1 | 0.656329 | 6.44E-77 |
| PPM1F | FLNA | 0.701676 | 3.67E-92 |  | INHBB | PDLIM1 | 0.719002 | 8.89E-99 |
| PPM1F | TLN1 | 0.69506 | 9.24E-90 |  | C1QTNF7 | MYH10 | 0.69873 | 4.38E-91 |
| MFNG | INF2 | 0.639936 | 4.90E-72 |  | RNF149 | PDLIM1 | 0.681321 | 5.61E-85 |
| MFNG | PDLIM1 | 0.672074 | 6.66E-82 |  | ARHGAP25 | INF2 | 0.618679 | 3.93E-66 |
| MFNG | FLNA | 0.664925 | 1.33E-79 |  | ARHGAP25 | PDLIM1 | 0.686078 | 1.33E-86 |
| MFNG | TLN1 | 0.603105 | 4.36E-62 |  | TGFA | PDLIM1 | 0.636466 | 4.85E-71 |
| MFNG | CAPZB | 0.62338 | 2.13E-67 |  | COL6A3 | MYH9 | 0.600474 | 2.00E-61 |
| LGALS1 | PDLIM1 | 0.670838 | 1.68E-81 |  | COL6A3 | FLNA | 0.659852 | 5.24E-78 |
| HMOX1 | PDLIM1 | 0.64095 | 2.50E-72 |  | ATP1A1 | CD2AP | 0.624198 | 1.27E-67 |
| MCM5 | INF2 | 0.626817 | 2.44E-68 |  | ATP1A1 | MYH10 | 0.634684 | 1.56E-70 |
| MCM5 | PDLIM1 | 0.640482 | 3.41E-72 |  | ATP1A1 | FLNB | 0.613716 | 8.09E-65 |
| MCM5 | FLNA | 0.664175 | 2.31E-79 |  | FSTL1 | PDLIM1 | 0.619679 | 2.12E-66 |
| MCM5 | TLN1 | 0.624646 | 9.61E-68 |  | FSTL1 | FLNA | 0.639181 | 8.09E-72 |
| MCM5 | ACTB | 0.602835 | 5.11E-62 |  | NFASC | MYH10 | 0.609148 | 1.25E-63 |
| MCM5 | CAPZB | 0.700407 | 1.07E-91 |  | IFI16 | PDLIM1 | 0.735691 | 1.22E-105 |
| CSF2RB | FLNA | 0.614621 | 4.68E-65 |  | IFI16 | FLNA | 0.63942 | 6.91E-72 |
| CSF2RB | TLN1 | 0.611981 | 2.30E-64 |  | IFI16 | CAPZB | 0.662686 | 6.80E-79 |
| IL2RB | PDLIM1 | 0.618658 | 3.98E-66 |  | CDS1 | CD2AP | 0.625032 | 7.54E-68 |
| CDKL1 | CD2AP | 0.671752 | 8.48E-82 |  | PTPN13 | CD2AP | 0.761599 | 2.14E-117 |
| PYGL | INF2 | 0.677656 | 9.58E-84 |  | PTPN13 | MYH10 | 0.619207 | 2.84E-66 |
| PYGL | PDLIM1 | 0.740623 | 9.05E-108 |  | PTPN13 | IQGAP1 | 0.600571 | 1.89E-61 |
| PYGL | FLNA | 0.600574 | 1.89E-61 |  | RBM47 | CD2AP | 0.714138 | 7.17E-97 |
| TRIM9 | PDLIM1 | 0.624415 | 1.11E-67 |  | PLB1 | CAPZB | 0.625671 | 5.04E-68 |
| RIN3 | INF2 | 0.667593 | 1.88E-80 |  | YEATS2 | MYH9 | 0.606831 | 4.92E-63 |
| RIN3 | PDLIM1 | 0.738006 | 1.24E-106 |  | YEATS2 | IQGAP1 | 0.633456 | 3.46E-70 |
| RIN3 | FLNA | 0.681999 | 3.31E-85 |  | YEATS2 | FLNA | 0.697969 | 8.28E-91 |
| RIN3 | CAPZB | 0.687918 | 3.06E-87 |  | YEATS2 | TLN1 | 0.683264 | 1.23E-85 |
| SIX4 | PDLIM1 | -0.62447 | 1.08E-67 |  | GRIK3 | INF2 | 0.65894 | 1.01E-77 |
| GALNT16 | MYH10 | 0.645233 | 1.40E-73 |  | HEYL | PDLIM1 | 0.610274 | 6.39E-64 |
| HIF1A | CD2AP | 0.636024 | 6.48E-71 |  | HEYL | MYH9 | 0.607789 | 2.80E-63 |
| HIF1A | IQGAP1 | 0.678958 | 3.52E-84 |  | HEYL | FLNA | 0.650899 | 2.88E-75 |
| DCAF11 | CD2AP | 0.624713 | 9.21E-68 |  | ARHGEF3 | CD2AP | 0.68024 | 1.30E-84 |
| DCAF11 | MYH10 | 0.64715 | 3.80E-74 |  | ARHGEF3 | MYH10 | 0.626992 | 2.19E-68 |
| PROCR | PDLIM1 | 0.694612 | 1.34E-89 |  | ARHGEF3 | IQGAP1 | 0.657141 | 3.62E-77 |
| CD40 | INF2 | 0.625277 | 6.46E-68 |  | ARHGEF3 | DSTN | 0.601208 | 1.31E-61 |
| CD40 | PDLIM1 | 0.711637 | 6.62E-96 |  | SAP30 | PDLIM1 | 0.783737 | 1.06E-128 |
| NFATC2 | IQGAP1 | 0.608435 | 1.91E-63 |  | GASK1B | MYH9 | 0.64359 | 4.25E-73 |
| RASSF2 | PDLIM1 | 0.637663 | 2.21E-71 |  | GASK1B | IQGAP1 | 0.655342 | 1.29E-76 |
| RASSF2 | FLNA | 0.646607 | 5.50E-74 |  | NPY5R | MYH10 | 0.689109 | 1.18E-87 |
| SAMHD1 | FLNA | 0.613586 | 8.75E-65 |  | RANBP3L | PDLIM1 | -0.62043 | 1.33E-66 |
| SAMHD1 | CAPZB | 0.628364 | 9.14E-69 |  | ESM1 | INF2 | 0.605294 | 1.22E-62 |
| PLS3 | CD2AP | 0.608579 | 1.75E-63 |  | ESM1 | PDLIM1 | 0.616703 | 1.32E-65 |
| PLS3 | MYH10 | 0.664342 | 2.04E-79 |  | TLR3 | PDLIM1 | 0.609131 | 1.26E-63 |
| PLS3 | IQGAP1 | 0.690581 | 3.59E-88 |  | CCDC127 | PDLIM1 | 0.611132 | 3.82E-64 |
| PLS3 | DSTN | 0.739527 | 2.72E-107 |  | COL1A2 | MYH9 | 0.615317 | 3.07E-65 |
| TIMP1 | PDLIM1 | 0.685168 | 2.73E-86 |  | COL1A2 | FLNA | 0.686583 | 8.89E-87 |
| TIMP1 | ACTB | 0.60076 | 1.70E-61 |  | FAM219A | INF2 | 0.677397 | 1.17E-83 |
| CAB39L | CD2AP | 0.615428 | 2.87E-65 |  | FAM219A | PDLIM1 | 0.607992 | 2.48E-63 |
| FGF9 | PDLIM1 | -0.72621 | 1.11E-101 |  | FAM219A | MYH9 | 0.645752 | 9.83E-74 |
| FLT1 | INF2 | 0.608081 | 2.35E-63 |  | FAM219A | FLNA | 0.671328 | 1.17E-81 |
| VWA8 | CD2AP | 0.745136 | 9.24E-110 |  | FAM219A | TLN1 | 0.671147 | 1.34E-81 |
| VWA8 | MYH10 | 0.615614 | 2.56E-65 |  | MAMDC2 | MYH10 | 0.658831 | 1.09E-77 |
| VWA8 | IQGAP1 | 0.610528 | 5.49E-64 |  | SVEP1 | MYH10 | 0.653029 | 6.54E-76 |
| TRADD | INF2 | 0.688292 | 2.27E-87 |  | SHOC1 | PDLIM1 | -0.60013 | 2.45E-61 |
| TRADD | PDLIM1 | 0.726692 | 7.08E-102 |  | PKNOX2 | MYH10 | 0.66098 | 2.33E-78 |
| CORO1A | PDLIM1 | 0.621272 | 7.91E-67 |  | DEPP1 | PDLIM1 | 0.700731 | 8.16E-92 |
| FA2H | PDLIM1 | -0.62462 | 9.80E-68 |  | OXGR1 | PDLIM1 | -0.70035 | 1.13E-91 |
| CAPN15 | INF2 | 0.659322 | 7.67E-78 |  | ZNF503 | MYH10 | 0.634568 | 1.68E-70 |
| STX4 | INF2 | 0.690203 | 4.87E-88 |  | BTNL9 | INF2 | 0.62521 | 6.74E-68 |
| STX4 | PDLIM1 | 0.719615 | 5.08E-99 |  | CCDC186 | CD2AP | 0.846786 | 6.38E-170 |
| CD276 | PDLIM1 | 0.662493 | 7.82E-79 |  | CCDC186 | MYH10 | 0.623999 | 1.44E-67 |
| CD276 | MYH9 | 0.647365 | 3.28E-74 |  | CCDC186 | IQGAP1 | 0.709118 | 6.06E-95 |
| CD276 | FLNA | 0.709442 | 4.57E-95 |  | CCDC186 | DSTN | 0.623373 | 2.14E-67 |
| CD276 | TLN1 | 0.601308 | 1.24E-61 |  | ARHGAP42 | IQGAP1 | 0.632301 | 7.31E-70 |
| CD276 | ACTB | 0.710635 | 1.60E-95 |  | GPR176 | INF2 | 0.603659 | 3.16E-62 |
| CD276 | CAPZB | 0.716635 | 7.62E-98 |  | GPR176 | PDLIM1 | 0.625216 | 6.71E-68 |
| SFRP1 | MYH10 | 0.6834 | 1.10E-85 |  | GPR176 | MYH9 | 0.624436 | 1.10E-67 |
| LAPTM4B | DSTN | 0.635709 | 7.97E-71 |  | GPR176 | FLNA | 0.681759 | 3.99E-85 |
| PLAT | MYH10 | 0.62812 | 1.07E-68 |  | GPR176 | TLN1 | 0.64025 | 3.98E-72 |
| NDRG1 | PDLIM1 | 0.601244 | 1.28E-61 |  | IKBIP | PDLIM1 | 0.735652 | 1.27E-105 |
| RELB | INF2 | 0.636179 | 5.86E-71 |  | NNMT | PDLIM1 | 0.787553 | 8.75E-131 |
| RELB | PDLIM1 | 0.673109 | 3.06E-82 |  | BMERB1 | MYH10 | 0.644404 | 2.45E-73 |
| PPP1R13L | INF2 | 0.762905 | 4.99E-118 |  | PIP4K2C | CD2AP | 0.610567 | 5.36E-64 |
| PPP1R13L | PDLIM1 | 0.733721 | 8.38E-105 |  | PIP4K2C | MYH10 | 0.67247 | 4.95E-82 |
| CD37 | PDLIM1 | 0.605154 | 1.32E-62 |  | MTMR10 | CD2AP | 0.748313 | 3.46E-111 |
| LYL1 | CAPZB | 0.626289 | 3.41E-68 |  | MTMR10 | MYH10 | 0.606972 | 4.53E-63 |
| TRMT1 | INF2 | 0.602228 | 7.26E-62 |  | MAPRE2 | IQGAP1 | 0.63174 | 1.05E-69 |
| NOVA2 | INF2 | 0.682238 | 2.74E-85 |  | EVA1C | INF2 | 0.607407 | 3.51E-63 |
| NOVA2 | MYH9 | 0.614769 | 4.27E-65 |  | EVA1C | PDLIM1 | 0.706962 | 3.96E-94 |
| NOVA2 | TLN1 | 0.616234 | 1.75E-65 |  | SAMD14 | INF2 | 0.682801 | 1.77E-85 |
| LILRB1 | PDLIM1 | 0.622598 | 3.47E-67 |  | GPRC5B | CD2AP | 0.601352 | 1.21E-61 |
| RASAL3 | INF2 | 0.606942 | 4.61E-63 |  | TUBA1A | PDLIM1 | 0.668197 | 1.20E-80 |
| RASAL3 | PDLIM1 | 0.620327 | 1.42E-66 |  | TUBA1A | FLNA | 0.600548 | 1.92E-61 |
| EBI3 | PDLIM1 | 0.618515 | 4.34E-66 |  | TUBA1A | ACTB | 0.609828 | 8.34E-64 |
| TJP3 | PDLIM1 | -0.62012 | 1.62E-66 |  | TUBA1A | CAPZB | 0.622137 | 4.62E-67 |
| TGFB1 | INF2 | 0.615472 | 2.79E-65 |  | AXL | PDLIM1 | 0.646327 | 6.65E-74 |
| TGFB1 | PDLIM1 | 0.739956 | 1.77E-107 |  | AXL | FLNA | 0.684989 | 3.15E-86 |
| TGFB1 | FLNA | 0.723906 | 9.65E-101 |  | SEMA6B | INF2 | 0.613459 | 9.44E-65 |
| TGFB1 | ACTB | 0.615629 | 2.54E-65 |  | SEMA6B | PDLIM1 | 0.613389 | 9.85E-65 |
| TGFB1 | CAPZB | 0.631054 | 1.63E-69 |  | SEMA6B | MYH9 | 0.608866 | 1.48E-63 |
| DENND3 | INF2 | 0.675428 | 5.27E-83 |  | SEMA6B | FLNA | 0.607471 | 3.37E-63 |
| DENND3 | TLN1 | 0.604851 | 1.57E-62 |  | TLCD3A | INF2 | 0.60389 | 2.76E-62 |
| RPS19 | PDLIM1 | 0.609626 | 9.40E-64 |  | TLCD3A | PDLIM1 | 0.700099 | 1.39E-91 |
| RPL18A | PDLIM1 | 0.609937 | 7.81E-64 |  | GGT6 | PDLIM1 | -0.63575 | 7.74E-71 |
| ARRDC2 | INF2 | 0.679879 | 1.72E-84 |  | ANGPTL4 | INF2 | 0.676106 | 3.14E-83 |
| ARRDC2 | PDLIM1 | 0.695204 | 8.21E-90 |  | ANGPTL4 | PDLIM1 | 0.80145 | 9.39E-139 |
| DLX5 | PDLIM1 | 0.612964 | 1.27E-64 |  | CD300A | PDLIM1 | 0.654479 | 2.37E-76 |
| ATP6V0A4 | PDLIM1 | -0.69086 | 2.86E-88 |  | DDIT4 | PDLIM1 | 0.728898 | 8.73E-103 |
| CAV1 | PDLIM1 | 0.653266 | 5.55E-76 |  | FOXI1 | PDLIM1 | -0.73169 | 5.99E-104 |
| HIBADH | CD2AP | 0.60389 | 2.76E-62 |  | PDHB | MYH10 | 0.665903 | 6.51E-80 |
| GRB10 | INF2 | 0.635569 | 8.73E-71 |  | PDHB | DSTN | 0.647203 | 3.66E-74 |
| PLOD3 | PDLIM1 | 0.69463 | 1.32E-89 |  | MLKL | INF2 | 0.683666 | 8.95E-86 |
| TMEM245 | CD2AP | 0.812461 | 1.56E-145 |  | MLKL | PDLIM1 | 0.676489 | 2.34E-83 |
| TMEM245 | MYH10 | 0.629724 | 3.84E-69 |  | REEP4 | ACTB | 0.64161 | 1.61E-72 |
| TMEM245 | IQGAP1 | 0.748643 | 2.45E-111 |  | REEP4 | CAPZB | 0.624375 | 1.14E-67 |
| TMEM245 | DSTN | 0.684101 | 6.35E-86 |  | TNXB | ACTN4 | 0.610912 | 4.36E-64 |
| SUSD1 | MYH10 | 0.685025 | 3.06E-86 |  | TNXB | MYH9 | 0.637855 | 1.95E-71 |
| AKNA | CAPZB | 0.612003 | 2.27E-64 |  | TNXB | MYH10 | 0.705874 | 1.01E-93 |
| CA9 | INF2 | 0.676991 | 1.60E-83 |  | TNXB | TLN1 | 0.616873 | 1.19E-65 |
| CA9 | PDLIM1 | 0.812355 | 1.83E-145 |  | BMP1 | PDLIM1 | 0.714002 | 8.10E-97 |
| NPDC1 | INF2 | 0.719723 | 4.60E-99 |  | BMP1 | FLNA | 0.632372 | 6.98E-70 |
| PDLIM1 | INF2 | 0.685405 | 2.27E-86 |  | MTCL1 | INF2 | 0.610131 | 6.96E-64 |
| PDLIM1 | PDLIM1 | 1 | 0 |  | COL3A1 | MYH9 | 0.631414 | 1.30E-69 |
| DNMBP | CD2AP | 0.645578 | 1.11E-73 |  | COL3A1 | FLNA | 0.682944 | 1.58E-85 |
| DNMBP | MYH10 | 0.701238 | 5.32E-92 |  | SLC20A2 | CD2AP | 0.632454 | 6.62E-70 |
| DNMBP | IQGAP1 | 0.615294 | 3.11E-65 |  | SLC20A2 | MYH10 | 0.767789 | 1.98E-120 |
| DNMBP | FLNB | 0.63224 | 7.61E-70 |  | SLC20A2 | DSTN | 0.648875 | 1.16E-74 |
| DNMBP | DSTN | 0.605508 | 1.07E-62 |  | AXIN2 | MYH10 | 0.646031 | 8.14E-74 |
| PALD1 | INF2 | 0.618244 | 5.13E-66 |  | VAMP5 | INF2 | 0.617027 | 1.08E-65 |
| PALD1 | PDLIM1 | 0.675672 | 4.38E-83 |  | VAMP5 | PDLIM1 | 0.720187 | 3.01E-99 |
| PALD1 | FLNA | 0.643198 | 5.53E-73 |  | PLA2G4F | PDLIM1 | -0.73953 | 2.72E-107 |
| UNC5B | INF2 | 0.643465 | 4.62E-73 |  | INPP5D | PDLIM1 | 0.634367 | 1.91E-70 |
| UNC5B | PDLIM1 | 0.629887 | 3.46E-69 |  | INPP5D | FLNA | 0.601961 | 8.48E-62 |
| UNC5B | MYH9 | 0.663839 | 2.94E-79 |  | INPP5D | CAPZB | 0.629082 | 5.78E-69 |
| UNC5B | FLNA | 0.682886 | 1.65E-85 |  | LGALS9 | PDLIM1 | 0.718317 | 1.66E-98 |
| UNC5B | TLN1 | 0.68598 | 1.44E-86 |  | LGALS9 | CAPZB | 0.609886 | 8.05E-64 |
| VSIR | INF2 | 0.674166 | 1.37E-82 |  | PXDC1 | INF2 | 0.725744 | 1.73E-101 |
| VSIR | PDLIM1 | 0.752382 | 4.78E-113 |  | PXDC1 | PDLIM1 | 0.765821 | 1.87E-119 |
| VSIR | FLNA | 0.649743 | 6.40E-75 |  | IRS1 | FLNB | 0.667843 | 1.56E-80 |
| VSIR | TLN1 | 0.61956 | 2.28E-66 |  | PARM1 | MYH10 | 0.670496 | 2.17E-81 |
| VSIR | CAPZB | 0.641004 | 2.41E-72 |  | PARM1 | DSTN | 0.603093 | 4.40E-62 |
| LIPA | IQGAP1 | 0.681258 | 5.90E-85 |  | AFAP1L2 | MYH10 | 0.627481 | 1.60E-68 |
| SFXN3 | INF2 | 0.696049 | 4.08E-90 |  | EFNA1 | INF2 | 0.60917 | 1.23E-63 |
| SFXN3 | PDLIM1 | 0.791232 | 7.79E-133 |  | EFNA1 | PDLIM1 | 0.650331 | 4.27E-75 |
| SFXN3 | FLNA | 0.656665 | 5.08E-77 |  | CD52 | PDLIM1 | 0.615479 | 2.78E-65 |
| CPEB3 | CD2AP | 0.686573 | 8.96E-87 |  | INO80E | INF2 | 0.621976 | 5.11E-67 |
| CPEB3 | MYH10 | 0.612458 | 1.73E-64 |  | BTD | CD2AP | 0.679091 | 3.17E-84 |
| RPL28 | PDLIM1 | 0.602937 | 4.81E-62 |  | BTD | MYH10 | 0.682584 | 2.09E-85 |
| ABI3 | INF2 | 0.664727 | 1.54E-79 |  | PCDH7 | MYH10 | 0.649841 | 5.99E-75 |
| ABI3 | PDLIM1 | 0.655062 | 1.57E-76 |  | P2RY1 | PDLIM1 | 0.602604 | 5.84E-62 |
| ABI3 | FLNA | 0.627364 | 1.73E-68 |  | CHD3 | ACTN4 | 0.62066 | 1.16E-66 |
| ABI3 | TLN1 | 0.620841 | 1.03E-66 |  | CHD3 | MYH9 | 0.630233 | 2.77E-69 |
| ABI3 | CAPZB | 0.674071 | 1.48E-82 |  | CHD3 | MYH10 | 0.688294 | 2.27E-87 |
| COL1A1 | FLNA | 0.63707 | 3.26E-71 |  | CHD3 | TLN1 | 0.601525 | 1.09E-61 |
| ALOX12 | INF2 | 0.625494 | 5.64E-68 |  | RNF150 | MYH10 | 0.653194 | 5.83E-76 |
| ABCC3 | INF2 | 0.614575 | 4.81E-65 |  | ADRA1B | INF2 | 0.600155 | 2.41E-61 |
| ABCC3 | PDLIM1 | 0.690432 | 4.05E-88 |  | ADRA1B | PDLIM1 | 0.650786 | 3.12E-75 |
| PMP22 | PDLIM1 | 0.644793 | 1.89E-73 |  | TCAF2 | PDLIM1 | 0.653928 | 3.49E-76 |
| PMP22 | FLNA | 0.660853 | 2.56E-78 |  | CD14 | CAPZB | 0.607327 | 3.67E-63 |
| PMP22 | CAPZB | 0.600673 | 1.78E-61 |  | SERPINB9 | PDLIM1 | 0.624017 | 1.43E-67 |
| ALDOC | PDLIM1 | 0.622412 | 3.89E-67 |  | CEL | PDLIM1 | -0.64679 | 4.85E-74 |
| CWH43 | PDLIM1 | -0.62341 | 2.09E-67 |  | PAQR8 | IQGAP1 | 0.621859 | 5.49E-67 |
| USP46 | CD2AP | 0.759664 | 1.82E-116 |  | PKHD1 | CD2AP | 0.620008 | 1.73E-66 |
| USP46 | MYH10 | 0.710534 | 1.75E-95 |  | CAVIN3 | PDLIM1 | 0.678909 | 3.65E-84 |
| USP46 | IQGAP1 | 0.695738 | 5.28E-90 |  | PYGO1 | MYH10 | 0.608 | 2.47E-63 |
| USP46 | DSTN | 0.629375 | 4.80E-69 |  | INSR | INF2 | 0.632773 | 5.39E-70 |
| TBC1D9 | CD2AP | 0.686032 | 1.38E-86 |  | NETO2 | PDLIM1 | 0.659179 | 8.49E-78 |
| TBC1D9 | MYH10 | 0.618835 | 3.57E-66 |  | CHST11 | PDLIM1 | 0.6333 | 3.83E-70 |
| TBC1D9 | IQGAP1 | 0.674585 | 1.00E-82 |  | CHST11 | CAPZB | 0.618088 | 5.65E-66 |
| TBC1D9 | FLNB | 0.660132 | 4.29E-78 |  | CLCN5 | CD2AP | 0.607116 | 4.16E-63 |
| JHY | CD2AP | 0.620968 | 9.55E-67 |  | APLN | PDLIM1 | 0.648002 | 2.12E-74 |
| NRXN2 | INF2 | 0.67939 | 2.52E-84 |  | ZNF581 | PDLIM1 | 0.621171 | 8.42E-67 |
| CCND1 | INF2 | 0.601778 | 9.42E-62 |  | MAP6 | MYH10 | 0.68539 | 2.29E-86 |
| FOLR3 | PDLIM1 | -0.60136 | 1.20E-61 |  | NMUR1 | INF2 | 0.627107 | 2.03E-68 |
| SLC15A3 | PDLIM1 | 0.612064 | 2.19E-64 |  | RGS19 | PDLIM1 | 0.683378 | 1.12E-85 |
| SLC15A3 | CAPZB | 0.645705 | 1.02E-73 |  | RGS19 | CAPZB | 0.644246 | 2.73E-73 |
| VWF | INF2 | 0.620395 | 1.36E-66 |  | SYNPO | PDLIM1 | 0.632256 | 7.53E-70 |
| VWF | PDLIM1 | 0.662098 | 1.04E-78 |  | SYNPO | FLNA | 0.62478 | 8.84E-68 |
| CLEC2B | PDLIM1 | 0.611238 | 3.59E-64 |  | MOB3A | INF2 | 0.737166 | 2.85E-106 |
| SELPLG | PDLIM1 | 0.650999 | 2.69E-75 |  | MOB3A | PDLIM1 | 0.799644 | 1.11E-137 |
| CORO1C | PDLIM1 | 0.658524 | 1.35E-77 |  | MOB3A | FLNA | 0.67719 | 1.37E-83 |
| CORO1C | FLNA | 0.641388 | 1.86E-72 |  | MOB3A | TLN1 | 0.622197 | 4.45E-67 |
| CORO1C | TLN1 | 0.600472 | 2.00E-61 |  | MOB3A | CAPZB | 0.668781 | 7.79E-81 |
| SH2B3 | MYH9 | 0.737969 | 1.28E-106 |  | ISG20 | PDLIM1 | 0.631731 | 1.06E-69 |
| SH2B3 | IQGAP1 | 0.716406 | 9.36E-98 |  | TPSAB1 | INF2 | 0.60278 | 5.27E-62 |
| SH2B3 | FLNA | 0.720469 | 2.32E-99 |  | SUCLG2 | CD2AP | 0.677493 | 1.09E-83 |
| SH2B3 | TLN1 | 0.769567 | 2.56E-121 |  | SLFN11 | PDLIM1 | 0.629416 | 4.67E-69 |
| SH2B3 | CAPZB | 0.612621 | 1.57E-64 |  | SLFN11 | FLNA | 0.621941 | 5.22E-67 |
| AKAP3 | MYH10 | 0.615711 | 2.41E-65 |  | TMCC1 | PDLIM1 | 0.688257 | 2.33E-87 |
| LTBR | PDLIM1 | 0.702945 | 1.25E-92 |  | RAB37 | PDLIM1 | 0.629722 | 3.84E-69 |
| OAS2 | FLNA | 0.605326 | 1.19E-62 |  | EGFL7 | INF2 | 0.657686 | 2.46E-77 |
| OAS2 | TLN1 | 0.605663 | 9.79E-63 |  | MRGPRF | MYH10 | 0.673922 | 1.65E-82 |
| OAS2 | CAPZB | 0.644134 | 2.94E-73 |  | SH3RF3 | INF2 | 0.607438 | 3.44E-63 |
| ARHGDIB | INF2 | 0.641014 | 2.39E-72 |  | CYSLTR1 | IQGAP1 | 0.609149 | 1.25E-63 |
| ARHGDIB | PDLIM1 | 0.764317 | 1.02E-118 |  | ABLIM3 | INF2 | 0.604549 | 1.88E-62 |
| ARHGDIB | FLNA | 0.607674 | 2.99E-63 |  | ABLIM3 | PDLIM1 | 0.640512 | 3.34E-72 |
| ARHGDIB | CAPZB | 0.663103 | 5.03E-79 |  | DMRT2 | PDLIM1 | -0.72855 | 1.22E-102 |
| GAPDH | PDLIM1 | 0.640726 | 2.90E-72 |  | MZT2A | PDLIM1 | 0.62511 | 7.18E-68 |
| ENO2 | PDLIM1 | 0.730259 | 2.38E-103 |  | PPP1R3B | PDLIM1 | 0.633382 | 3.63E-70 |
| FRK | CD2AP | 0.744595 | 1.61E-109 |  | C1QB | PDLIM1 | 0.605406 | 1.14E-62 |
| MAN1A1 | CD2AP | 0.602458 | 6.36E-62 |  | C1QA | PDLIM1 | 0.607002 | 4.45E-63 |
| NCOA7 | CD2AP | 0.710866 | 1.31E-95 |  | DAG1 | ACTN4 | 0.644493 | 2.31E-73 |
| NCOA7 | IQGAP1 | 0.624262 | 1.22E-67 |  | DAG1 | MYH10 | 0.73152 | 7.07E-104 |
| BVES | MYH10 | 0.640804 | 2.75E-72 |  | DAG1 | IQGAP1 | 0.607718 | 2.92E-63 |
| ALDH5A1 | CD2AP | 0.643149 | 5.72E-73 |  | DAG1 | FLNB | 0.629122 | 5.64E-69 |
| EPM2A | CD2AP | 0.655382 | 1.26E-76 |  | DAG1 | DSTN | 0.621267 | 7.93E-67 |
| EPM2A | MYH10 | 0.692812 | 5.85E-89 |  | EHBP1L1 | INF2 | 0.682395 | 2.43E-85 |
| VEGFA | INF2 | 0.690451 | 3.99E-88 |  | EHBP1L1 | PDLIM1 | 0.669089 | 6.20E-81 |
| VEGFA | PDLIM1 | 0.634998 | 1.27E-70 |  | EHBP1L1 | FLNA | 0.7549 | 3.24E-114 |
| LAMA4 | PDLIM1 | 0.655561 | 1.11E-76 |  | EHBP1L1 | TLN1 | 0.601661 | 1.01E-61 |
| LAMA4 | FLNA | 0.614202 | 6.03E-65 |  | EHBP1L1 | CAPZB | 0.620579 | 1.22E-66 |
| LY86 | PDLIM1 | 0.603672 | 3.14E-62 |  | CSPG4 | INF2 | 0.692234 | 9.37E-89 |
| C7 | MYH10 | 0.65521 | 1.42E-76 |  | CSPG4 | PDLIM1 | 0.668354 | 1.07E-80 |
| NNT | CD2AP | 0.625633 | 5.16E-68 |  | CSPG4 | FLNA | 0.63224 | 7.61E-70 |
| SLC4A9 | PDLIM1 | -0.70485 | 2.45E-93 |  | SNX33 | INF2 | 0.701849 | 3.17E-92 |
| LOX | PDLIM1 | 0.627472 | 1.61E-68 |  | SNX33 | PDLIM1 | 0.737869 | 1.42E-106 |
| SPARC | PDLIM1 | 0.710237 | 2.27E-95 |  | SNX33 | FLNA | 0.656076 | 7.70E-77 |
| SPARC | MYH9 | 0.614985 | 3.75E-65 |  | SNX33 | TLN1 | 0.642467 | 9.04E-73 |
| SPARC | FLNA | 0.654446 | 2.43E-76 |  | NUDT4 | MYH10 | 0.624704 | 9.27E-68 |
| HMGCR | CD2AP | 0.726473 | 8.70E-102 |  | HSPB7 | MYH10 | 0.608574 | 1.76E-63 |
| HMGCR | IQGAP1 | 0.675218 | 6.18E-83 |  | CNP | MYH10 | 0.623493 | 1.98E-67 |
| HMGCR | DSTN | 0.63548 | 9.25E-71 |  | JUP | ACTN4 | 0.695033 | 9.45E-90 |
| CDH6 | PDLIM1 | 0.617752 | 6.94E-66 |  | MARCHF10 | PDLIM1 | -0.60456 | 1.87E-62 |
| LMNB1 | CAPZB | 0.620024 | 1.71E-66 |  | SPTBN2 | PDLIM1 | -0.62135 | 7.52E-67 |
| ST8SIA4 | PDLIM1 | 0.631614 | 1.14E-69 |  | MARCHF3 | FLNA | 0.604728 | 1.69E-62 |
| PCDH12 | INF2 | 0.64094 | 2.51E-72 |  | ZHX3 | MYH10 | 0.638916 | 9.65E-72 |
| PCDH12 | MYH9 | 0.685244 | 2.57E-86 |  | PHLDA3 | PDLIM1 | 0.659556 | 6.48E-78 |
| PCDH12 | FLNA | 0.625899 | 4.37E-68 |  | GLIS1 | INF2 | 0.611008 | 4.12E-64 |
| PCDH12 | TLN1 | 0.692278 | 9.04E-89 |  | AKIRIN1 | CD2AP | 0.671765 | 8.41E-82 |
| DPYSL3 | FLNA | 0.665425 | 9.25E-80 |  | AKIRIN1 | MYH10 | 0.603734 | 3.03E-62 |
| STC2 | INF2 | 0.644827 | 1.84E-73 |  | AKIRIN1 | IQGAP1 | 0.675216 | 6.19E-83 |
| STC2 | PDLIM1 | 0.70101 | 6.44E-92 |  | AKIRIN1 | DSTN | 0.621232 | 8.10E-67 |
| PFKFB4 | PDLIM1 | 0.70737 | 2.78E-94 |  | SH3PXD2B | FLNA | 0.600025 | 2.59E-61 |
| ATP6V1A | CD2AP | 0.613798 | 7.70E-65 |  | CD248 | INF2 | 0.614853 | 4.06E-65 |
| ARHGEF26 | MYH10 | 0.649226 | 9.14E-75 |  | CD248 | PDLIM1 | 0.643946 | 3.34E-73 |
| EPB41L5 | CD2AP | 0.72398 | 9.01E-101 |  | CD248 | FLNA | 0.614026 | 6.70E-65 |
| EPB41L5 | MYH10 | 0.658569 | 1.31E-77 |  | SEZ6L2 | PDLIM1 | 0.653878 | 3.61E-76 |
| TFCP2L1 | PDLIM1 | -0.61087 | 4.47E-64 |  | PPM1E | PDLIM1 | -0.61647 | 1.52E-65 |
| ITGA4 | IQGAP1 | 0.654641 | 2.12E-76 |  | PCCA | CD2AP | 0.685267 | 2.53E-86 |
| ITGA4 | TLN1 | 0.609411 | 1.07E-63 |  | TP53I11 | INF2 | 0.615117 | 3.46E-65 |
| PCGF1 | INF2 | 0.677166 | 1.40E-83 |  | TP53I11 | MYH9 | 0.684549 | 4.46E-86 |
| PCGF1 | PDLIM1 | 0.659739 | 5.69E-78 |  | TP53I11 | TLN1 | 0.64528 | 1.36E-73 |
| LOXL3 | FLNA | 0.611128 | 3.84E-64 |  | PHYKPL | INF2 | 0.601333 | 1.22E-61 |
| DOK1 | PDLIM1 | 0.638545 | 1.23E-71 |  | KCNE3 | INF2 | 0.667939 | 1.45E-80 |
| DOK1 | FLNA | 0.644186 | 2.84E-73 |  | TOM1L2 | ACTN4 | 0.674072 | 1.48E-82 |
| DOK1 | ACTB | 0.624174 | 1.29E-67 |  | TOM1L2 | MYH10 | 0.645394 | 1.25E-73 |
| DOK1 | CAPZB | 0.683877 | 7.58E-86 |  | PLEKHD1 | PDLIM1 | -0.64202 | 1.22E-72 |
| CCDC88A | IQGAP1 | 0.650905 | 2.87E-75 |  | TUBB6 | INF2 | 0.601864 | 8.97E-62 |
| FN1 | MYH9 | 0.624906 | 8.16E-68 |  | TUBB6 | PDLIM1 | 0.728898 | 8.73E-103 |
| FN1 | FLNA | 0.67207 | 6.68E-82 |  | TUBB6 | FLNA | 0.726885 | 5.90E-102 |
| SLC9A2 | PDLIM1 | -0.68018 | 1.37E-84 |  | TUBB6 | ACTB | 0.689708 | 7.27E-88 |
| UXS1 | CD2AP | 0.657216 | 3.44E-77 |  | TUBB6 | CAPZB | 0.673033 | 3.24E-82 |
| UXS1 | MYH10 | 0.65887 | 1.06E-77 |  | BNIP3 | PDLIM1 | 0.628618 | 7.78E-69 |
| UXS1 | IQGAP1 | 0.600603 | 1.86E-61 |  | CLEC14A | INF2 | 0.602312 | 6.92E-62 |
| UXS1 | DSTN | 0.636041 | 6.41E-71 |  | CLEC14A | MYH9 | 0.609499 | 1.01E-63 |
| HPCAL1 | INF2 | 0.758409 | 7.20E-116 |  | CLEC14A | TLN1 | 0.611942 | 2.35E-64 |
| HPCAL1 | PDLIM1 | 0.737695 | 1.69E-106 |  | CLK2 | INF2 | 0.60548 | 1.09E-62 |
| DARS1 | PDLIM1 | 0.644806 | 1.87E-73 |  | DIRAS1 | PDLIM1 | -0.68406 | 6.55E-86 |
| PLCL1 | MYH10 | 0.639172 | 8.14E-72 |  | TYMS | INF2 | 0.660063 | 4.51E-78 |
| SLC1A4 | INF2 | 0.605534 | 1.06E-62 |  | RIMKLA | PDLIM1 | 0.604244 | 2.25E-62 |
| SLC1A4 | PDLIM1 | 0.670868 | 1.65E-81 |  | GPR4 | INF2 | 0.701339 | 4.88E-92 |
| SLC1A4 | FLNA | 0.62231 | 4.15E-67 |  | GPR4 | PDLIM1 | 0.675622 | 4.54E-83 |
| SLC1A4 | TLN1 | 0.602968 | 4.73E-62 |  | IRX3 | PDLIM1 | 0.618242 | 5.13E-66 |
| ATP6V1B1 | PDLIM1 | -0.71931 | 6.70E-99 |  | MYOZ1 | MYH10 | 0.642882 | 6.84E-73 |
| PARD3B | CD2AP | 0.717322 | 4.09E-98 |  | AP3S1 | PDLIM1 | 0.668865 | 7.32E-81 |
| PARD3B | MYH10 | 0.752916 | 2.71E-113 |  | ODF3B | INF2 | 0.680239 | 1.30E-84 |
| PARD3B | IQGAP1 | 0.653406 | 5.03E-76 |  | ODF3B | PDLIM1 | 0.69413 | 1.99E-89 |
| PARD3B | FLNB | 0.606588 | 5.68E-63 |  | LRRC75B | INF2 | 0.707418 | 2.67E-94 |
| PARD3B | DSTN | 0.603133 | 4.29E-62 |  | CSRNP3 | MYH10 | 0.657989 | 1.98E-77 |
| BCL9 | CD2AP | 0.671947 | 7.33E-82 |  | PARP10 | INF2 | 0.69777 | 9.78E-91 |
| BCL9 | ACTN4 | 0.627012 | 2.16E-68 |  | MSC | PDLIM1 | 0.632722 | 5.57E-70 |
| BCL9 | MYH10 | 0.65158 | 1.80E-75 |  | EXOC3L1 | INF2 | 0.786489 | 3.36E-130 |
| BCL9 | IQGAP1 | 0.663371 | 4.14E-79 |  | EXOC3L1 | PDLIM1 | 0.60771 | 2.93E-63 |
| BCL9 | FLNB | 0.637706 | 2.15E-71 |  | TCAIM | CD2AP | 0.76546 | 2.81E-119 |
| BCL9 | TLN1 | 0.616159 | 1.84E-65 |  | TCAIM | DSTN | 0.672596 | 4.50E-82 |
| WLS | MYH10 | 0.632733 | 5.53E-70 |  | LDLRAD3 | PDLIM1 | 0.675418 | 5.31E-83 |
| WLS | DSTN | 0.615424 | 2.87E-65 |  | LDLRAD3 | FLNA | 0.617763 | 6.89E-66 |
| NID1 | PDLIM1 | 0.636712 | 4.13E-71 |  | VWA1 | INF2 | 0.697391 | 1.34E-90 |
| NID1 | MYH9 | 0.713571 | 1.19E-96 |  | VWA1 | PDLIM1 | 0.640362 | 3.69E-72 |
| NID1 | IQGAP1 | 0.629481 | 4.48E-69 |  | FJX1 | PDLIM1 | 0.650835 | 3.01E-75 |
| NID1 | FLNA | 0.688233 | 2.38E-87 |  | TPPP2 | PDLIM1 | -0.63325 | 3.94E-70 |
| NID1 | TLN1 | 0.695443 | 6.74E-90 |  | CDH5 | INF2 | 0.62921 | 5.33E-69 |
| SIPA1L2 | MYH9 | 0.687297 | 5.03E-87 |  | CDH5 | MYH9 | 0.676359 | 2.59E-83 |
| SIPA1L2 | IQGAP1 | 0.653889 | 3.59E-76 |  | CDH5 | FLNA | 0.602857 | 5.04E-62 |
| SIPA1L2 | FLNA | 0.663068 | 5.16E-79 |  | CDH5 | TLN1 | 0.68294 | 1.58E-85 |
| SIPA1L2 | TLN1 | 0.708002 | 1.61E-94 |  | GIPC3 | INF2 | 0.694637 | 1.31E-89 |
| ACADM | CD2AP | 0.728206 | 1.69E-102 |  | GIPC3 | MYH9 | 0.628903 | 6.48E-69 |
| CDK18 | INF2 | 0.752943 | 2.63E-113 |  | GIPC3 | FLNA | 0.604836 | 1.59E-62 |
| CDK18 | PDLIM1 | 0.721493 | 9.04E-100 |  | GIPC3 | TLN1 | 0.621609 | 6.41E-67 |
| P3H1 | PDLIM1 | 0.671775 | 8.34E-82 |  | SLC9A4 | PDLIM1 | -0.63209 | 8.38E-70 |
| P3H1 | FLNA | 0.645246 | 1.39E-73 |  | HCLS1 | PDLIM1 | 0.695517 | 6.34E-90 |
| P3H1 | ACTB | 0.615503 | 2.74E-65 |  | HCLS1 | FLNA | 0.607139 | 4.11E-63 |
| P3H1 | CAPZB | 0.692973 | 5.12E-89 |  | HCLS1 | CAPZB | 0.638458 | 1.31E-71 |
| SLC2A1 | PDLIM1 | 0.695254 | 7.88E-90 |  | MTURN | MYH10 | 0.628297 | 9.54E-69 |
| NRP2 | FLNA | 0.631059 | 1.63E-69 |  | GAS1 | MYH10 | 0.68855 | 1.84E-87 |
| CCN2 | MYH10 | 0.603156 | 4.24E-62 |  | PRF1 | PDLIM1 | 0.635708 | 7.98E-71 |
| TCF21 | MYH10 | 0.650114 | 4.96E-75 |  | S1PR5 | INF2 | 0.615043 | 3.62E-65 |
| SLC16A7 | INF2 | -0.61381 | 7.63E-65 |  | AATK | INF2 | 0.681453 | 5.07E-85 |
| SLC16A7 | PDLIM1 | -0.6364 | 5.07E-71 |  | PLAG1 | PDLIM1 | -0.60262 | 5.80E-62 |
| ECRG4 | MYH10 | 0.65788 | 2.14E-77 |  | CHST15 | PDLIM1 | 0.604703 | 1.72E-62 |
| CTNNAL1 | MYH10 | 0.612774 | 1.43E-64 |  | CHST15 | FLNA | 0.606795 | 5.03E-63 |
| CTNNAL1 | DSTN | 0.667362 | 2.23E-80 |  | P2RY8 | INF2 | 0.66436 | 2.01E-79 |
| NEK6 | INF2 | 0.63003 | 3.15E-69 |  | P2RY8 | TLN1 | 0.648603 | 1.40E-74 |
| NEK6 | PDLIM1 | 0.680831 | 8.23E-85 |  | SHMT2 | INF2 | 0.636204 | 5.76E-71 |
| PGF | PDLIM1 | 0.600848 | 1.61E-61 |  | SHMT2 | PDLIM1 | 0.704181 | 4.34E-93 |
| IRF2BPL | MYH10 | 0.67434 | 1.20E-82 |  | SYNM | TLN1 | 0.600341 | 2.16E-61 |
| AREL1 | CD2AP | 0.61873 | 3.80E-66 |  | CAPN12 | INF2 | 0.61333 | 1.02E-64 |
| AREL1 | MYH10 | 0.694328 | 1.69E-89 |  | BGN | INF2 | 0.614406 | 5.33E-65 |
| TGFB3 | MYH9 | 0.621795 | 5.71E-67 |  | BGN | FLNA | 0.638227 | 1.52E-71 |
| TGFB3 | FLNA | 0.710356 | 2.05E-95 |  | GLRX5 | DSTN | 0.618219 | 5.21E-66 |
| TEK | CD2AP | 0.606647 | 5.49E-63 |  | CSF1R | CAPZB | 0.617835 | 6.59E-66 |
| TEK | MYH10 | 0.635747 | 7.77E-71 |  | PAPPA | MYH10 | 0.62761 | 1.48E-68 |
| TEK | IQGAP1 | 0.616305 | 1.68E-65 |  | CAMK1D | MYH9 | 0.62273 | 3.19E-67 |
| TEK | TLN1 | 0.610541 | 5.45E-64 |  | CAMK1D | IQGAP1 | 0.635216 | 1.10E-70 |
| TEK | DSTN | 0.621413 | 7.25E-67 |  | CAMK1D | TLN1 | 0.65801 | 1.95E-77 |
| ARAP3 | INF2 | 0.718875 | 9.98E-99 |  | DDX41 | PDLIM1 | 0.684392 | 5.05E-86 |
| ARAP3 | MYH9 | 0.645083 | 1.55E-73 |  | MEX3B | FLNA | 0.60945 | 1.04E-63 |
| ARAP3 | FLNA | 0.645977 | 8.45E-74 |  | ZNRF3 | CD2AP | 0.715769 | 1.66E-97 |
| ARAP3 | TLN1 | 0.640539 | 3.28E-72 |  | RFLNB | MYH9 | 0.627502 | 1.58E-68 |
| PCDHB10 | PDLIM1 | 0.642306 | 1.01E-72 |  | RFLNB | FLNA | 0.603126 | 4.31E-62 |
| TMEM131L | MYH9 | 0.653022 | 6.58E-76 |  | RFLNB | TLN1 | 0.633729 | 2.90E-70 |
| TMEM131L | IQGAP1 | 0.624706 | 9.25E-68 |  | SRARP | PDLIM1 | -0.62105 | 9.06E-67 |
| TMEM131L | FLNA | 0.605782 | 9.13E-63 |  | PRKX | IQGAP1 | 0.605617 | 1.01E-62 |
| TMEM131L | TLN1 | 0.68093 | 7.62E-85 |  | TMPRSS2 | PDLIM1 | -0.70995 | 2.93E-95 |
| CAT | CD2AP | 0.658684 | 1.21E-77 |  | KCNJ12 | MYH10 | 0.613223 | 1.09E-64 |
| CXCR4 | PDLIM1 | 0.761319 | 2.92E-117 |  | PRKD1 | CD2AP | 0.651656 | 1.70E-75 |
| ZNF205 | INF2 | 0.656739 | 4.82E-77 |  | PRKD1 | IQGAP1 | 0.626815 | 2.45E-68 |
| GLIPR2 | PDLIM1 | 0.610968 | 4.22E-64 |  | CSF1 | PDLIM1 | 0.621131 | 8.63E-67 |
| GLIPR2 | FLNA | 0.637372 | 2.67E-71 |  | CSF1 | FLNA | 0.680119 | 1.43E-84 |
| GLIPR2 | ACTB | 0.661966 | 1.15E-78 |  | CSF1 | ACTB | 0.609739 | 8.79E-64 |
| GLIPR2 | CAPZB | 0.68777 | 3.45E-87 |  | CSF1 | CAPZB | 0.723921 | 9.52E-101 |
| P4HA1 | PDLIM1 | 0.68314 | 1.35E-85 |  | PTP4A3 | PDLIM1 | 0.604852 | 1.57E-62 |
| HVCN1 | FLNA | 0.63201 | 8.82E-70 |  | TMEM255B | INF2 | 0.694459 | 1.52E-89 |
| HVCN1 | TLN1 | 0.649569 | 7.22E-75 |  | PROS1 | PDLIM1 | 0.658764 | 1.14E-77 |
| HVCN1 | CAPZB | 0.638943 | 9.47E-72 |  | STING1 | PDLIM1 | 0.669981 | 3.19E-81 |
| RASSF8 | CD2AP | 0.732134 | 3.91E-104 |  | STING1 | FLNA | 0.702762 | 1.46E-92 |
| RASSF8 | MYH10 | 0.619422 | 2.49E-66 |  | STING1 | CAPZB | 0.651012 | 2.66E-75 |
| RASSF8 | IQGAP1 | 0.655241 | 1.39E-76 |  | CDCA2 | PDLIM1 | 0.623055 | 2.60E-67 |
| RASSF8 | DSTN | 0.602486 | 6.25E-62 |  | SMIM10 | PDLIM1 | 0.625192 | 6.82E-68 |
| BHLHE41 | PDLIM1 | 0.719254 | 7.06E-99 |  | CLCNKB | PDLIM1 | -0.67979 | 1.84E-84 |
| ITPR2 | CD2AP | 0.642742 | 7.52E-73 |  | JAG2 | INF2 | 0.728183 | 1.72E-102 |
| ITPR2 | IQGAP1 | 0.602923 | 4.85E-62 |  | JAG2 | PDLIM1 | 0.675597 | 4.63E-83 |
| PRDX4 | PDLIM1 | 0.625541 | 5.47E-68 |  | JAG2 | FLNA | 0.603775 | 2.95E-62 |
| ADGRE5 | INF2 | 0.606613 | 5.60E-63 |  | FMNL1 | PDLIM1 | 0.617862 | 6.49E-66 |
| ADGRE5 | PDLIM1 | 0.734219 | 5.15E-105 |  | ADSS1 | INF2 | 0.719467 | 5.81E-99 |
| ADGRE5 | FLNA | 0.722773 | 2.77E-100 |  | INPP5J | PDLIM1 | -0.72408 | 8.19E-101 |
| ADGRE5 | TLN1 | 0.614726 | 4.39E-65 |  | PPIL6 | CD2AP | 0.634056 | 2.34E-70 |
| ADGRE5 | CAPZB | 0.673081 | 3.12E-82 |  | IL3RA | INF2 | 0.649122 | 9.82E-75 |
| PDE1B | INF2 | 0.624952 | 7.93E-68 |  | IL3RA | PDLIM1 | 0.641327 | 1.94E-72 |
| PDE1B | PDLIM1 | 0.600631 | 1.83E-61 |  | MAPK11 | INF2 | 0.677114 | 1.45E-83 |
| TUBA1B | IQGAP1 | 0.613709 | 8.12E-65 |  | MAPK11 | PDLIM1 | 0.601817 | 9.22E-62 |
| TUBA1B | CAPZB | 0.607979 | 2.50E-63 |  | BRCC3 | CD2AP | 0.712479 | 3.14E-96 |
| NRK | PDLIM1 | -0.60092 | 1.55E-61 |  | BRCC3 | IQGAP1 | 0.618835 | 3.57E-66 |
| NMI | PDLIM1 | 0.686361 | 1.06E-86 |  | OLFML2A | INF2 | 0.655725 | 9.87E-77 |
| NMI | CAPZB | 0.634886 | 1.36E-70 |  | OLFML2A | PDLIM1 | 0.642183 | 1.09E-72 |
| TNFAIP6 | PDLIM1 | 0.641347 | 1.91E-72 |  | INKA1 | INF2 | 0.642578 | 8.39E-73 |
| PFKFB2 | PDLIM1 | -0.60051 | 1.97E-61 |  | P4HB | PDLIM1 | 0.667537 | 1.96E-80 |
| PREX1 | INF2 | 0.62395 | 1.49E-67 |  | PBX1 | CD2AP | 0.650085 | 5.06E-75 |
| PREX1 | PDLIM1 | 0.626113 | 3.81E-68 |  | PBX1 | MYH10 | 0.725624 | 1.93E-101 |
| PREX1 | MYH9 | 0.651368 | 2.08E-75 |  | PBX1 | DSTN | 0.612319 | 1.88E-64 |
| PREX1 | FLNA | 0.682761 | 1.82E-85 |  | NDUFA4L2 | INF2 | 0.653038 | 6.51E-76 |
| PREX1 | TLN1 | 0.741459 | 3.90E-108 |  | NDUFA4L2 | PDLIM1 | 0.779196 | 2.82E-126 |
| PREX1 | CAPZB | 0.63946 | 6.73E-72 |  | SRL | MYH10 | 0.621207 | 8.23E-67 |
| TOX2 | INF2 | 0.630671 | 2.09E-69 |  | NAT8L | PDLIM1 | -0.62934 | 4.90E-69 |
| PMEPA1 | PDLIM1 | 0.609568 | 9.73E-64 |  | RASA3 | INF2 | 0.665988 | 6.12E-80 |
| PMEPA1 | FLNA | 0.681449 | 5.08E-85 |  | RASA3 | PDLIM1 | 0.696968 | 1.91E-90 |
| DMAC2L | CD2AP | 0.623048 | 2.62E-67 |  | RASA3 | MYH9 | 0.609416 | 1.07E-63 |
| TNFSF9 | PDLIM1 | 0.622589 | 3.48E-67 |  | RASA3 | FLNA | 0.774022 | 1.40E-123 |
| CD70 | PDLIM1 | 0.630723 | 2.02E-69 |  | RASA3 | TLN1 | 0.680004 | 1.56E-84 |
| C3 | PDLIM1 | 0.679542 | 2.24E-84 |  | RASA3 | CAPZB | 0.653098 | 6.24E-76 |
| CD93 | MYH9 | 0.732644 | 2.38E-104 |  | SOWAHB | CD2AP | 0.622452 | 3.80E-67 |
| CD93 | IQGAP1 | 0.69281 | 5.86E-89 |  | NAP1L3 | MYH10 | 0.645405 | 1.25E-73 |
| CD93 | FLNA | 0.672163 | 6.23E-82 |  | THBS2 | FLNA | 0.634237 | 2.08E-70 |
| CD93 | TLN1 | 0.721434 | 9.55E-100 |  | CLCNKA | PDLIM1 | -0.67841 | 5.36E-84 |
| FAM110A | INF2 | 0.688863 | 1.43E-87 |  | TNFRSF4 | INF2 | 0.686181 | 1.22E-86 |
| FAM110A | PDLIM1 | 0.678652 | 4.45E-84 |  | TNFRSF4 | PDLIM1 | 0.666701 | 3.63E-80 |
| FAM110A | FLNA | 0.625603 | 5.26E-68 |  | ZNF395 | INF2 | 0.705612 | 1.27E-93 |
| FAM110A | CAPZB | 0.630083 | 3.05E-69 |  | ZNF395 | PDLIM1 | 0.679294 | 2.71E-84 |
| S1PR4 | PDLIM1 | 0.616084 | 1.92E-65 |  | PPARA | CD2AP | 0.671122 | 1.36E-81 |
| MCF2L | INF2 | 0.675506 | 4.97E-83 |  | C3orf70 | MYH9 | 0.61074 | 4.84E-64 |
| SGPP1 | CD2AP | 0.675198 | 6.28E-83 |  | C3orf70 | FLNA | 0.609678 | 9.11E-64 |
| PLEKHG3 | MYH10 | 0.65909 | 9.05E-78 |  | C3orf70 | TLN1 | 0.615165 | 3.36E-65 |
| FAM78A | PDLIM1 | 0.641155 | 2.18E-72 |  | TSPYL4 | CD2AP | 0.712241 | 3.88E-96 |
| FAM78A | CAPZB | 0.601858 | 9.00E-62 |  | TSPYL4 | MYH10 | 0.717264 | 4.31E-98 |
| TRAF2 | INF2 | 0.613202 | 1.10E-64 |  | TSPYL4 | IQGAP1 | 0.678896 | 3.69E-84 |
| F2RL3 | INF2 | 0.635283 | 1.05E-70 |  | TSPYL4 | DSTN | 0.664914 | 1.34E-79 |
| FBXL16 | INF2 | 0.606826 | 4.94E-63 |  | BCAM | ACTN4 | 0.601556 | 1.07E-61 |
| GNAI1 | CD2AP | 0.645713 | 1.01E-73 |  | COL4A1 | PDLIM1 | 0.667319 | 2.30E-80 |
| GNAI1 | IQGAP1 | 0.62507 | 7.36E-68 |  | COL4A1 | MYH9 | 0.697132 | 1.66E-90 |
| GNAI1 | DSTN | 0.69025 | 4.69E-88 |  | COL4A1 | FLNA | 0.687105 | 5.86E-87 |
| KDR | MYH9 | 0.602357 | 6.74E-62 |  | COL4A1 | TLN1 | 0.661314 | 1.83E-78 |
| KDR | TLN1 | 0.663739 | 3.17E-79 |  | GJA4 | INF2 | 0.618608 | 4.10E-66 |
| GAL3ST1 | PDLIM1 | 0.622449 | 3.80E-67 |  | TET3 | FLNA | 0.645901 | 8.89E-74 |
| RAC2 | PDLIM1 | 0.623769 | 1.67E-67 |  | TET3 | TLN1 | 0.622997 | 2.70E-67 |
| APOBEC3F | INF2 | 0.608104 | 2.32E-63 |  | SPRY4 | INF2 | 0.649664 | 6.76E-75 |
| APOBEC3F | PDLIM1 | 0.627445 | 1.64E-68 |  | SPRY4 | PDLIM1 | 0.609596 | 9.57E-64 |
| DOCK4 | IQGAP1 | 0.705993 | 9.15E-94 |  | SPRY4 | MYH9 | 0.642918 | 6.68E-73 |
| DOCK4 | TLN1 | 0.628961 | 6.25E-69 |  | SPRY4 | FLNA | 0.643621 | 4.16E-73 |
| PODXL | ACTN4 | 0.62158 | 6.53E-67 |  | SPRY4 | TLN1 | 0.676021 | 3.35E-83 |
| PODXL | MYH9 | 0.605839 | 8.83E-63 |  | TRPV2 | INF2 | 0.639749 | 5.55E-72 |
| PODXL | TLN1 | 0.660895 | 2.48E-78 |  | TRPV2 | PDLIM1 | 0.714915 | 3.58E-97 |
| TWSG1 | CD2AP | 0.645842 | 9.25E-74 |  | TRPV2 | FLNA | 0.657281 | 3.28E-77 |
| TWSG1 | IQGAP1 | 0.625354 | 6.15E-68 |  | TRPV2 | CAPZB | 0.625041 | 7.50E-68 |
| TWSG1 | DSTN | 0.720625 | 2.01E-99 |  | GABRD | INF2 | 0.671042 | 1.44E-81 |
| ARHGAP22 | PDLIM1 | 0.601976 | 8.40E-62 |  | GABRD | PDLIM1 | 0.672506 | 4.82E-82 |
| MYO5C | MYH10 | 0.608104 | 2.32E-63 |  | EIF4EBP1 | PDLIM1 | 0.634723 | 1.52E-70 |
| DLL4 | INF2 | 0.680368 | 1.18E-84 |  | COL14A1 | MYH10 | 0.69177 | 1.37E-88 |
| DLL4 | PDLIM1 | 0.631459 | 1.26E-69 |  | HEPACAM2 | PDLIM1 | -0.73934 | 3.27E-107 |
| EGLN3 | INF2 | 0.683345 | 1.15E-85 |  | HES4 | INF2 | 0.69177 | 1.37E-88 |
| EGLN3 | PDLIM1 | 0.771382 | 3.10E-122 |  | PRELP | MYH10 | 0.633467 | 3.44E-70 |
| RHBDF2 | INF2 | 0.621291 | 7.81E-67 |  | IL1RAP | IQGAP1 | 0.652534 | 9.25E-76 |
| RHBDF2 | PDLIM1 | 0.749615 | 8.87E-112 |  | KIAA0895L | INF2 | 0.608866 | 1.48E-63 |
| RHBDF2 | CAPZB | 0.608103 | 2.32E-63 |  | ACADSB | CD2AP | 0.689317 | 9.95E-88 |
| ARHGEF6 | IQGAP1 | 0.658512 | 1.37E-77 |  | LAMA2 | MYH10 | 0.678535 | 4.87E-84 |
| ARHGEF6 | TLN1 | 0.604087 | 2.46E-62 |  | MYO6 | CD2AP | 0.793906 | 2.37E-134 |
| DOCK6 | INF2 | 0.73378 | 7.91E-105 |  | MYO6 | MYH10 | 0.619979 | 1.76E-66 |
| DOCK6 | MYH9 | 0.653431 | 4.94E-76 |  | ADH1B | MYH10 | 0.639673 | 5.84E-72 |
| DOCK6 | FLNA | 0.655408 | 1.23E-76 |  | TCF4 | MYH9 | 0.679411 | 2.48E-84 |
| DOCK6 | TLN1 | 0.657339 | 3.15E-77 |  | TCF4 | IQGAP1 | 0.658977 | 9.81E-78 |
| PLVAP | INF2 | 0.714548 | 4.97E-97 |  | TCF4 | FLNA | 0.631224 | 1.46E-69 |
| PLVAP | PDLIM1 | 0.644442 | 2.39E-73 |  | TCF4 | TLN1 | 0.666055 | 5.83E-80 |
| COLGALT1 | INF2 | 0.608375 | 1.98E-63 |  | HRH1 | FLNA | 0.62733 | 1.76E-68 |
| COLGALT1 | PDLIM1 | 0.758121 | 9.86E-116 |  | COL27A1 | INF2 | 0.697577 | 1.15E-90 |
| COLGALT1 | FLNA | 0.691149 | 2.27E-88 |  | ADA | PDLIM1 | 0.638628 | 1.17E-71 |
| COLGALT1 | ACTB | 0.620242 | 1.50E-66 |  | ARID5A | INF2 | 0.678289 | 5.89E-84 |
| COLGALT1 | CAPZB | 0.654234 | 2.82E-76 |  | ARID5A | PDLIM1 | 0.68356 | 9.72E-86 |
| PXDN | PDLIM1 | 0.66256 | 7.45E-79 |  | PDLIM7 | FLNA | 0.664017 | 2.59E-79 |
| PXDN | MYH9 | 0.657379 | 3.06E-77 |  | PDLIM7 | ACTB | 0.621682 | 6.13E-67 |
| PXDN | FLNA | 0.705818 | 1.06E-93 |  | CASP4 | PDLIM1 | 0.676371 | 2.56E-83 |
| PXDN | TLN1 | 0.623559 | 1.90E-67 |  | CASP4 | CAPZB | 0.623424 | 2.07E-67 |
| PXDN | CAPZB | 0.614444 | 5.21E-65 |  | FUT11 | INF2 | 0.692211 | 9.55E-89 |
| COL5A1 | FLNA | 0.674131 | 1.41E-82 |  | FUT11 | PDLIM1 | 0.754567 | 4.63E-114 |
| METTL26 | PDLIM1 | 0.613918 | 7.16E-65 |  | ANXA4 | PDLIM1 | 0.674476 | 1.09E-82 |
| GMFG | INF2 | 0.649341 | 8.45E-75 |  | GAL3ST4 | PDLIM1 | 0.606266 | 6.87E-63 |
| GMFG | PDLIM1 | 0.720832 | 1.66E-99 |  | STMN3 | PDLIM1 | 0.623259 | 2.29E-67 |
| THEMIS2 | PDLIM1 | 0.608372 | 1.98E-63 |  | PDCD1LG2 | IQGAP1 | 0.62294 | 2.80E-67 |
| PRRG1 | CD2AP | 0.712693 | 2.60E-96 |  | ADAMTSL2 | MYH10 | 0.68364 | 9.13E-86 |
| PRRG1 | MYH10 | 0.605188 | 1.29E-62 |  | CYRIA | PDLIM1 | 0.619039 | 3.15E-66 |
| PRRG1 | IQGAP1 | 0.674247 | 1.29E-82 |  | KIF13B | CD2AP | 0.615952 | 2.08E-65 |
| PRRG1 | DSTN | 0.690001 | 5.73E-88 |  | KIF13B | MYH10 | 0.62439 | 1.13E-67 |
| LILRB2 | PDLIM1 | 0.60264 | 5.72E-62 |  | KIF13B | FLNB | 0.607877 | 2.65E-63 |
| RFTN1 | PDLIM1 | 0.644688 | 2.02E-73 |  | DNM3 | MYH10 | 0.615004 | 3.71E-65 |
| RFTN1 | MYH9 | 0.667047 | 2.81E-80 |  | SIRPA | PDLIM1 | 0.707532 | 2.41E-94 |
| RFTN1 | FLNA | 0.721327 | 1.05E-99 |  | CHSY3 | PDLIM1 | 0.602506 | 6.18E-62 |
| RFTN1 | TLN1 | 0.699194 | 2.97E-91 |  | CHSY3 | FLNA | 0.61103 | 4.07E-64 |
| RFTN1 | CAPZB | 0.697275 | 1.48E-90 |  | HIBCH | CD2AP | 0.60576 | 9.25E-63 |
| ACLY | INF2 | 0.654229 | 2.83E-76 |  | SVIP | CD2AP | 0.602659 | 5.65E-62 |
| ACLY | PDLIM1 | 0.657027 | 3.93E-77 |  | TMEM116 | PDLIM1 | -0.60286 | 5.04E-62 |
| ACLY | IQGAP1 | 0.614988 | 3.74E-65 |  | PEG3 | MYH10 | 0.670181 | 2.75E-81 |
| ACLY | FLNA | 0.618139 | 5.47E-66 |  | LRBA | CD2AP | 0.814102 | 1.40E-146 |
| ACLY | TLN1 | 0.675216 | 6.19E-83 |  | LRBA | MYH10 | 0.629214 | 5.31E-69 |
| ANO1 | FLNA | 0.615357 | 2.99E-65 |  | LRBA | IQGAP1 | 0.733519 | 1.02E-104 |
| RARA | INF2 | 0.796356 | 9.24E-136 |  | RCSD1 | PDLIM1 | 0.601477 | 1.12E-61 |
| RARA | PDLIM1 | 0.701472 | 4.36E-92 |  | RCSD1 | IQGAP1 | 0.619869 | 1.89E-66 |
| EMILIN2 | PDLIM1 | 0.624984 | 7.77E-68 |  | RCSD1 | FLNA | 0.644844 | 1.82E-73 |
| EMILIN2 | FLNA | 0.624164 | 1.30E-67 |  | RCSD1 | TLN1 | 0.667838 | 1.57E-80 |
| EMILIN2 | CAPZB | 0.635645 | 8.31E-71 |  | RCSD1 | CAPZB | 0.624808 | 8.68E-68 |
| PER2 | INF2 | 0.667487 | 2.03E-80 |  | FAM169A | PDLIM1 | -0.64058 | 3.19E-72 |
| PER2 | PDLIM1 | 0.605396 | 1.15E-62 |  | MTOR | CD2AP | 0.670813 | 1.71E-81 |
| PTPRE | INF2 | 0.60109 | 1.40E-61 |  | MTOR | MYH9 | 0.619 | 3.22E-66 |
| PTPRE | PDLIM1 | 0.701016 | 6.41E-92 |  | MTOR | MYH10 | 0.722893 | 2.48E-100 |
| PTPRE | FLNA | 0.668353 | 1.07E-80 |  | MTOR | IQGAP1 | 0.71868 | 1.19E-98 |
| PTPRE | TLN1 | 0.633955 | 2.50E-70 |  | MTOR | FLNB | 0.61974 | 2.04E-66 |
| MATN2 | MYH10 | 0.704686 | 2.82E-93 |  | MTOR | TLN1 | 0.633703 | 2.95E-70 |
| RHBG | PDLIM1 | -0.74729 | 1.00E-110 |  | GRK5 | INF2 | 0.637299 | 2.81E-71 |
| WASF3 | MYH10 | 0.690642 | 3.42E-88 |  | GRK5 | PDLIM1 | 0.633879 | 2.63E-70 |
| MYH10 | ACTN4 | 0.610452 | 5.74E-64 |  | GRK5 | MYH9 | 0.711377 | 8.33E-96 |
| MYH10 | MYH10 | 1 | 0 |  | GRK5 | FLNA | 0.71962 | 5.05E-99 |
| MYH10 | DSTN | 0.608224 | 2.16E-63 |  | GRK5 | TLN1 | 0.712675 | 2.64E-96 |
| KL | CD2AP | 0.625108 | 7.19E-68 |  | PRMT6 | CD2AP | 0.670046 | 3.04E-81 |
| C1QTNF6 | PDLIM1 | 0.622167 | 4.53E-67 |  | PRMT6 | MYH10 | 0.677865 | 8.16E-84 |
| GIMAP4 | PDLIM1 | 0.62251 | 3.66E-67 |  | PRMT6 | IQGAP1 | 0.64022 | 4.06E-72 |
| GIMAP4 | TLN1 | 0.600877 | 1.59E-61 |  | PRMT6 | DSTN | 0.648051 | 2.05E-74 |
| KRBA1 | INF2 | 0.674452 | 1.11E-82 |  | SREBF2 | CD2AP | 0.603101 | 4.37E-62 |
| KRBA1 | PDLIM1 | 0.633147 | 4.23E-70 |  | SREBF2 | ACTN4 | 0.630827 | 1.89E-69 |
| LOXL2 | PDLIM1 | 0.709988 | 2.83E-95 |  | SREBF2 | MYH10 | 0.66774 | 1.68E-80 |
| LOXL2 | FLNA | 0.63605 | 6.37E-71 |  | SREBF2 | FLNB | 0.633119 | 4.31E-70 |
| GSTM3 | MYH10 | 0.628833 | 6.78E-69 |  | TGM2 | PDLIM1 | 0.640416 | 3.56E-72 |
| VAV3 | CD2AP | 0.609226 | 1.19E-63 |  | TGM2 | FLNA | 0.642863 | 6.93E-73 |
| SORT1 | MYH10 | 0.775033 | 4.21E-124 |  | INF2 | INF2 | 1 | 0 |
| SORT1 | IQGAP1 | 0.601826 | 9.17E-62 |  | INF2 | PDLIM1 | 0.685405 | 2.27E-86 |
| SORT1 | DSTN | 0.64922 | 9.18E-75 |  | FCGR3A | PDLIM1 | 0.612128 | 2.11E-64 |
| LDHA | PDLIM1 | 0.748493 | 2.86E-111 |  | GGTA1 | PDLIM1 | 0.652494 | 9.51E-76 |
| IL15RA | PDLIM1 | 0.660521 | 3.25E-78 |  | COL5A2 | MYH9 | 0.618984 | 3.25E-66 |
| KCTD1 | MYH10 | 0.614727 | 4.39E-65 |  | COL5A2 | FLNA | 0.673002 | 3.31E-82 |
| DDB2 | INF2 | 0.652381 | 1.03E-75 |  | PSMB8 | PDLIM1 | 0.62247 | 3.75E-67 |
| DDB2 | PDLIM1 | 0.747417 | 8.77E-111 |  | COL15A1 | MYH9 | 0.70601 | 9.02E-94 |
| SLC43A3 | PDLIM1 | 0.612285 | 1.92E-64 |  | COL15A1 | FLNA | 0.671272 | 1.22E-81 |
| PDGFRA | MYH10 | 0.669238 | 5.55E-81 |  | COL15A1 | TLN1 | 0.652547 | 9.16E-76 |
| COL4A2 | PDLIM1 | 0.696186 | 3.64E-90 |  | NOTCH4 | INF2 | 0.725216 | 2.84E-101 |
| COL4A2 | MYH9 | 0.73946 | 2.90E-107 |  | NOTCH4 | TLN1 | 0.616234 | 1.75E-65 |
| COL4A2 | FLNA | 0.755172 | 2.42E-114 |  | SMIM5 | PDLIM1 | -0.69692 | 1.98E-90 |
| COL4A2 | TLN1 | 0.710463 | 1.86E-95 |  | CARD16 | PDLIM1 | 0.683164 | 1.33E-85 |
| COL4A2 | CAPZB | 0.624602 | 9.88E-68 |  | LST1 | PDLIM1 | 0.609789 | 8.53E-64 |
| POGLUT2 | PDLIM1 | 0.62467 | 9.47E-68 |  | MCCD1 | PDLIM1 | -0.65092 | 2.84E-75 |
| ETS1 | INF2 | 0.636958 | 3.51E-71 |  | RACK1 | PDLIM1 | 0.686986 | 6.44E-87 |
| ETS1 | PDLIM1 | 0.606097 | 7.58E-63 |  | ZNF425 | MYH10 | 0.604997 | 1.45E-62 |
| ETS1 | MYH9 | 0.70964 | 3.84E-95 |  | C4orf47 | PDLIM1 | 0.682661 | 1.97E-85 |
| ETS1 | IQGAP1 | 0.706796 | 4.57E-94 |  | INSYN1 | PDLIM1 | -0.60644 | 6.19E-63 |
| ETS1 | FLNA | 0.696966 | 1.91E-90 |  | EXOC3L4 | INF2 | 0.686181 | 1.22E-86 |
| ETS1 | TLN1 | 0.752592 | 3.82E-113 |  | LIN52 | MYH10 | 0.605658 | 9.82E-63 |
| ANXA1 | PDLIM1 | 0.617354 | 8.85E-66 |  | VGLL3 | MYH10 | 0.618821 | 3.60E-66 |
| CEMIP2 | IQGAP1 | 0.617372 | 8.76E-66 |  | DENND1B | CD2AP | 0.652315 | 1.08E-75 |
| ADAM19 | FLNA | 0.68864 | 1.71E-87 |  | SIPA1 | INF2 | 0.633218 | 4.04E-70 |
| ADAM19 | CAPZB | 0.610513 | 5.54E-64 |  | SIPA1 | PDLIM1 | 0.68031 | 1.23E-84 |
| FBXO21 | CD2AP | 0.678426 | 5.30E-84 |  | SIPA1 | FLNA | 0.664714 | 1.56E-79 |
| TBX3 | MYH10 | 0.647117 | 3.88E-74 |  | SIPA1 | ACTB | 0.622831 | 3.00E-67 |
| HILPDA | INF2 | 0.626812 | 2.45E-68 |  | SIPA1 | CAPZB | 0.700443 | 1.04E-91 |
| HILPDA | PDLIM1 | 0.757467 | 2.01E-115 |  | SYNJ2BP | CD2AP | 0.722651 | 3.10E-100 |
| NHSL1 | MYH10 | 0.654038 | 3.23E-76 |  | SYNJ2BP | MYH10 | 0.701973 | 2.85E-92 |
| DYSF | INF2 | 0.674767 | 8.71E-83 |  | SYNJ2BP | IQGAP1 | 0.615572 | 2.63E-65 |
| DYSF | PDLIM1 | 0.629856 | 3.52E-69 |  | SYNJ2BP | DSTN | 0.60509 | 1.37E-62 |
| DYSF | MYH9 | 0.668533 | 9.37E-81 |  | GPSM3 | PDLIM1 | 0.696727 | 2.33E-90 |
| DYSF | FLNA | 0.624124 | 1.33E-67 |  | GPSM3 | CAPZB | 0.644994 | 1.65E-73 |
| DYSF | TLN1 | 0.725047 | 3.32E-101 |  | DNASE1 | PDLIM1 | -0.66226 | 9.29E-79 |
| CCDC142 | INF2 | 0.64651 | 5.88E-74 |  | CSNK1E | INF2 | 0.628814 | 6.86E-69 |
| FBXL8 | INF2 | 0.670553 | 2.08E-81 |  | TSPAN4 | INF2 | 0.742528 | 1.32E-108 |
| FHOD1 | INF2 | 0.746672 | 1.90E-110 |  | TSPAN4 | PDLIM1 | 0.740299 | 1.25E-107 |
| FHOD1 | PDLIM1 | 0.665263 | 1.04E-79 |  | TMEM213 | PDLIM1 | -0.69073 | 3.18E-88 |
| FHOD1 | FLNA | 0.678961 | 3.51E-84 |  | ANG | INF2 | 0.691427 | 1.81E-88 |
| ITM2C | MYH10 | 0.601712 | 9.79E-62 |  | ANG | PDLIM1 | 0.646841 | 4.69E-74 |
| TBC1D4 | CD2AP | 0.656505 | 5.68E-77 |  | NEURL1B | MYH9 | 0.641402 | 1.85E-72 |
| THSD1 | MYH9 | 0.647772 | 2.48E-74 |  | NEURL1B | FLNA | 0.643682 | 3.99E-73 |
| THSD1 | FLNA | 0.616274 | 1.71E-65 |  | NEURL1B | TLN1 | 0.628234 | 9.93E-69 |
| THSD1 | TLN1 | 0.638665 | 1.14E-71 |  | B3GNT10 | CD2AP | 0.693135 | 4.49E-89 |
| LMO7 | CD2AP | 0.648767 | 1.25E-74 |  | FER1L6 | PDLIM1 | -0.62498 | 7.79E-68 |
| LMO7 | MYH10 | 0.63286 | 5.09E-70 |  | MYL5 | INF2 | 0.623334 | 2.19E-67 |
| CCM2 | PDLIM1 | 0.602885 | 4.96E-62 |  | GCGR | PDLIM1 | -0.74274 | 1.07E-108 |
| CCM2 | ACTB | 0.604052 | 2.51E-62 |  | FADS3 | PDLIM1 | 0.650215 | 4.62E-75 |
| TTYH3 | INF2 | 0.661205 | 1.98E-78 |  | C4B | PDLIM1 | 0.635747 | 7.77E-71 |
| TTYH3 | PDLIM1 | 0.688145 | 2.55E-87 |  | ZNF469 | FLNA | 0.61462 | 4.68E-65 |
| ADAMTS7 | INF2 | 0.675462 | 5.13E-83 |  | C14orf132 | MYH10 | 0.648934 | 1.12E-74 |
| ADAMTS7 | PDLIM1 | 0.649885 | 5.81E-75 |  | TAPBP | INF2 | 0.657415 | 2.98E-77 |
| ADAMTS7 | MYH9 | 0.627409 | 1.68E-68 |  | TAPBP | PDLIM1 | 0.738272 | 9.50E-107 |
| ADAMTS7 | FLNA | 0.652837 | 7.49E-76 |  | TAPBP | CAPZB | 0.601693 | 9.90E-62 |
| ABHD17C | MYH10 | 0.608965 | 1.39E-63 |  | PSMB9 | PDLIM1 | 0.618767 | 3.72E-66 |
| TM6SF1 | IQGAP1 | 0.63637 | 5.17E-71 |  | PCDHGC3 | MYH9 | 0.685834 | 1.61E-86 |
| HLX | INF2 | 0.601029 | 1.45E-61 |  | PCDHGC3 | IQGAP1 | 0.741459 | 3.90E-108 |
| HS6ST1 | MYH10 | 0.667164 | 2.58E-80 |  | PCDHGC3 | FLNA | 0.699849 | 1.71E-91 |
| GYPC | INF2 | 0.622116 | 4.68E-67 |  | PCDHGC3 | TLN1 | 0.76718 | 3.97E-120 |
| GYPC | PDLIM1 | 0.688695 | 1.64E-87 |  | PNMA2 | INF2 | 0.607415 | 3.49E-63 |
| MYC | INF2 | 0.609052 | 1.32E-63 |  | PNMA2 | PDLIM1 | 0.670969 | 1.53E-81 |
| MYC | PDLIM1 | 0.66019 | 4.11E-78 |  | PLEKHO2 | PDLIM1 | 0.631393 | 1.31E-69 |
| MYC | FLNA | 0.609889 | 8.04E-64 |  | PLEKHO2 | MYH9 | 0.61853 | 4.30E-66 |
| NRM | INF2 | 0.719667 | 4.84E-99 |  | PLEKHO2 | FLNA | 0.709104 | 6.13E-95 |
| NRM | PDLIM1 | 0.721149 | 1.24E-99 |  | PLEKHO2 | TLN1 | 0.668267 | 1.14E-80 |
| NRM | FLNA | 0.617555 | 7.83E-66 |  | PLEKHO2 | ACTB | 0.661299 | 1.85E-78 |
| NRM | ACTB | 0.608455 | 1.88E-63 |  | PLEKHO2 | CAPZB | 0.730479 | 1.93E-103 |
| NRM | CAPZB | 0.635065 | 1.21E-70 |  | MRPL33 | CD2AP | 0.60609 | 7.62E-63 |
| IL18BP | PDLIM1 | 0.679428 | 2.44E-84 |  | MRPL33 | DSTN | 0.664068 | 2.49E-79 |
| IL18BP | CAPZB | 0.640071 | 4.48E-72 |  | APOBEC3C | PDLIM1 | 0.707592 | 2.29E-94 |
| SULF1 | MYH9 | 0.61124 | 3.59E-64 |  | C4A | PDLIM1 | 0.617917 | 6.27E-66 |
| SULF1 | FLNA | 0.685031 | 3.05E-86 |  | ADH1C | PDLIM1 | -0.60608 | 7.67E-63 |
| SORL1 | CD2AP | 0.656583 | 5.38E-77 |  | SHANK3 | INF2 | 0.751028 | 2.00E-112 |
| SORL1 | IQGAP1 | 0.640801 | 2.76E-72 |  | SHANK3 | TLN1 | 0.61462 | 4.68E-65 |
| FDX1 | DSTN | 0.638579 | 1.21E-71 |  | PECAM1 | INF2 | 0.62106 | 9.02E-67 |
| CASP1 | PDLIM1 | 0.687114 | 5.82E-87 |  | PECAM1 | PDLIM1 | 0.604179 | 2.33E-62 |
| SQOR | PDLIM1 | 0.696565 | 2.66E-90 |  | PECAM1 | MYH9 | 0.62838 | 9.05E-69 |
| PAQR5 | CD2AP | 0.627645 | 1.44E-68 |  | PECAM1 | TLN1 | 0.671723 | 8.68E-82 |
| SEMA6D | MYH10 | 0.637086 | 3.23E-71 |  | MYO15B | INF2 | 0.644293 | 2.64E-73 |
| DBT | CD2AP | 0.764376 | 9.56E-119 |  | FBXO17 | INF2 | 0.697129 | 1.67E-90 |
| DBT | MYH10 | 0.655849 | 9.04E-77 |  | FBXO17 | PDLIM1 | 0.67872 | 4.22E-84 |
| DBT | IQGAP1 | 0.600489 | 1.99E-61 |  | MARCKS | IQGAP1 | 0.625045 | 7.48E-68 |
| DBT | DSTN | 0.611347 | 3.36E-64 |  | MARCKS | FLNA | 0.607014 | 4.42E-63 |
| CGREF1 | PDLIM1 | 0.618714 | 3.84E-66 |  | MARCKS | CAPZB | 0.652093 | 1.26E-75 |
| ENTPD1 | PDLIM1 | 0.626839 | 2.41E-68 |  |  |  |  |  |

**Figure S1**

Correlation analysis between DEGs and disulfidptosis-related genes.
